# Supplementary material for: Metabolomics Insights into Chemical Convergence in Xanthomonas perforans and Metabolic Changes Following Treatment with the Small Molecule Carvacrol
Source: MDPI journal article supplement (doi:10.3390/metabo11120879), 2021-12-16
Supplement: s1 [file s1]

## Pathway analyses

A. **Pathway Analyses on BioCyc** ([www.biocyc.com](http://www.biocyc.com), Karp *et al.* 2019; Paley and Karp, 2021).

Pathway coverage analyses were carried out on BioCyc using the metabolomics pathway coverage tool..

Here, the annotation for each of the significant pathways in Xp91-118 in both positive and negative ion phases are presented. Annotation of gene loci in Xp91-118 are also available on BioCyc ([www.biocyc.org](http://www.biocyc.org)).

- a. Positive ion phase: Metabolic pathway coverage report identified of 18 pathways for metabolites in the positive phase. The table below shows the pathways and metabolites.

Supplementary Table S3. Positive Phase Pathways and metabolites covered in each pathway. Only the underlined compounds are the significant metabolites from our metabolomics annotation.

| Pathways                                            | Covered Compounds                                                      |
|-----------------------------------------------------|------------------------------------------------------------------------|
| adenosylcobalamin salvage from cobinamide I         | GMP<br>phosphate<br>nicotinate                                         |
| biotin-carboxyl carrier protein assembly            | phosphate<br>biotin<br>AMP                                             |
| L-arginine biosynthesis I (via L-ornithine)         | L-ornithine<br>phosphate<br>L-glutamine<br>AMP                         |
| L-asparagine biosynthesis II                        | L-asparagine<br>AMP                                                    |
| L-cysteine biosynthesis VI (from L-methionine)      | L-cysteine<br>L-cystathionine<br>L-serine<br>L-methionine<br>phosphate |
| L-histidine degradation II                          | urocanate                                                              |
| L-lysine biosynthesis I                             | phosphate<br>L-lysine                                                  |
| L-tryptophan degradation I (via anthranilate)       | L-kynurenine<br>anthranilate                                           |
| proline to cytochrome bo oxidase electron transfer  | L-proline                                                              |
| putrescine degradation II                           | putrescine<br>phosphate                                                |
| pyridoxal 5'-phosphate salvage I                    | pyridoxine                                                             |
| pyrimidine ribonucleosides salvage II               | uridine<br>uracil<br>cytidine                                          |
| superpathway of L-isoleucine biosynthesis I         | L-isoleucine<br>phosphate                                              |
| superpathway of L-serine and glycine biosynthesis I | L-serine<br>glycine<br>phosphate                                       |

Supplementary Table S3 (continued).

| Pathways                                                        | Covered Compounds                          |
|-----------------------------------------------------------------|--------------------------------------------|
| superpathway of pyrimidine deoxyribonucleoside salvage          | 2'-deoxycytidine                           |
| superpathway of pyrimidine ribonucleotides de novo biosynthesis | L-glutamine<br>phosphate<br>UMP<br>orotate |
| taurine degradation IV                                          | taurine                                    |
| tetrapyrrole biosynthesis I (from glutamate)                    | AMP<br>5-aminolevulinate                   |

- b. Negative ion phase: A pathway covering set of 48 pathways covers significant metabolites in the negative phase. The table below shows the pathways and metabolites in each pathway. While 24 metabolites originally cover pathways of Xp91-118, the different forms of the metabolites are also included.

Supplementary Table S4. Negative Phase Pathways and metabolites covered in each pathway. Only the underlined compounds are the significant metabolites from our metabolomics annotation.

| Pathways                                                | Covered Compounds                                                                                                                                 |
|---------------------------------------------------------|---------------------------------------------------------------------------------------------------------------------------------------------------|
| 2-oxopentenoate degradation                             | (S)-4-hydroxy-2-oxopentanoate<br>pyruvate<br>2-oxopent-4-enoate                                                                                   |
| biotin biosynthesis I                                   | S-adenosyl-L-methionine<br>S-adenosyl-4-methylthio-2-oxobutanoate<br><br>L-methionine<br>L-alanine<br>S-adenosyl-L-homocysteine                   |
| CMP-2-deoxy-D-manno-octulosonate biosynthesis           | phosphoenolpyruvate<br>2-deoxy- $\alpha$ -D-manno-2-octulosonate                                                                                  |
| D-galactonate degradation                               | D-galactonate<br>2-dehydro-2-deoxy-D-galactonate<br>pyruvate                                                                                      |
| glycerol and glycerophosphodiester degradation          | glycerol                                                                                                                                          |
| glycine betaine biosynthesis I (Gram-negative bacteria) | glycine betaine                                                                                                                                   |
| glycolysis III (from glucose)                           | 2-phospho-D-glycerate<br>2-phospho-D-glycerate<br>pyruvate<br>phosphoenolpyruvate<br>2-phospho-D-glyceroyl-phosphate<br>2,2-diphospho-D-glycerate |
| glyoxylate cycle                                        | (S)-malate<br>oxaloacetate<br><i>cis</i> -aconitate<br>D- <i>threo</i> -isocitrate<br>glyoxylate<br>succinate                                     |
| indole-2-acetate biosynthesis V (bacteria and fungi)    | (indol-2-yl)acetate                                                                                                                               |

Supplementary Table S4 (continued).

| Pathways                                       | Covered Compounds                                                                                                                                                                                                                   |
|------------------------------------------------|-------------------------------------------------------------------------------------------------------------------------------------------------------------------------------------------------------------------------------------|
| L-arginine biosynthesis I (via L-ornithine)    | N-acetyl-L-ornithine<br>L-ornithine<br>acetate<br>2-oxoglutarate<br>L-glutamate<br><br><i>N</i> -acetyl-L-glutamate<br>L-glutamine<br>L-citrulline<br>L-arginine<br>fumarate<br><br>L-aspartate<br>AMP                              |
| L-asparagine degradation I                     | L-asparagine<br>L-aspartate                                                                                                                                                                                                         |
| L-cysteine biosynthesis VI (from L-methionine) | L-cysteine<br><br>O-succinyl-L-homoserine<br>L-cystathionine<br>succinate<br>L-homocysteine<br>L-serine<br><i>S</i> -adenosyl-L-methionine<br><i>S</i> -adenosyl-L-homocysteine<br>L-methionine<br><i>S</i> -ribosyl-L-homocysteine |
| L-histidine degradation II                     | N-formyl-L-glutamate<br>L-glutamate<br>formate<br><i>N</i> -formimino-L-glutamate<br><br>urocanate<br>L-histidine                                                                                                                   |

Supplementary Table S4 (continued).

| Pathways                                      | Covered Compounds                                                                                                                                                                                  |
|-----------------------------------------------|----------------------------------------------------------------------------------------------------------------------------------------------------------------------------------------------------|
| L-lysine biosynthesis I                       | L-aspartate<br>L-aspartyl-4-phosphate<br>L-aspartate-semialdehyde<br>pyruvate<br>2-oxoglutarate<br><br>L-glutamate<br>L,L-diaminopimelate<br>succinate<br><i>meso</i> -diaminopimelate<br>L-lysine |
| L-lysine degradation VI                       | L-2-aminoadipate<br>L-lysine<br>2-oxoglutarate<br>L-glutamate                                                                                                                                      |
| L-phenylalanine biosynthesis I                | chorismate<br><br><i>keto</i> -phenylpyruvate<br>L-glutamate<br>L-phenylalanine<br>2-oxoglutarate                                                                                                  |
| L-proline biosynthesis I                      | L-glutamate<br>L-glutamate-5-semialdehyde<br>L-proline<br>(S)-1-pyrroline-5-carboxylate                                                                                                            |
| L-threonine degradation II                    | glycine<br>L-2-amino-2-oxobutanoate<br>L-threonine                                                                                                                                                 |
| L-tryptophan degradation I (via anthranilate) | L-tryptophan<br>L-kynurenine<br><br>formate<br>L-alanine                                                                                                                                           |

Supplementary Table S4 (continued).

| Pathways                                                  | Covered Compounds                                                                                          |
|-----------------------------------------------------------|------------------------------------------------------------------------------------------------------------|
| L-tyrosine degradation I                                  | 2-oxoglutarate<br>L-tyrosine<br>4-hydroxyphenylpyruvate<br>L-glutamate<br>fumarate<br><br>acetoacetate     |
| L-valine degradation I                                    | (S)-2-amino-2-methylpropanoate<br>2-oxoglutarate<br>L-glutamate<br>2-methyl-2-oxobutanoate<br><br>L-valine |
| levulinate degradation                                    | 4-hydroxypentanoate<br>AMP<br>4-oxopentanoate                                                              |
| methylglyoxal degradation I                               | (R)-lactate<br><br>pyruvate                                                                                |
| octane oxidation                                          | octanoate<br>AMP                                                                                           |
| palmitate biosynthesis II<br>(bacteria and plants)        | laurate<br>AMP<br>palmitate                                                                                |
| palmitoleate biosynthesis I (from<br>(5Z)-dodec-5-enoate) | palmitoleate                                                                                               |
| phosphopantothenate<br>biosynthesis I                     | 2-methyl-2-oxobutanoate<br>(R)-pantoate<br>$\beta$ -alanine<br>AMP                                         |

Supplementary Table S4 (continued).

| Pathways                                                    | Covered Compounds                                                                                                                                                                                     |
|-------------------------------------------------------------|-------------------------------------------------------------------------------------------------------------------------------------------------------------------------------------------------------|
| protocatechuate degradation I (meta-cleavage pathway)       | 2-hydroxy-4-oxobutane-1,2,4-tricarboxylate<br><br>pyruvate<br>oxaloacetate<br>(1E)-4-oxobut-1-ene-1,2,4-tricarboxylate<br>(1E,2E)-4-hydroxybuta-1,2-diene-1,2,4-tricarboxylate<br><br>protocatechuate |
| protocatechuate degradation II (ortho-cleavage pathway)     | 2-oxoadipate<br>2-carboxy- <i>cis,cis</i> -muconate<br>protocatechuate                                                                                                                                |
| purine nucleotides degradation II (aerobic)                 | xanthine<br><br>GMP<br>AMP<br>hypoxanthine                                                                                                                                                            |
| purine ribonucleosides degradation                          | D-ribose 5-phosphate<br><br>hypoxanthine<br><br>xanthine                                                                                                                                              |
| pyridoxal 5'-phosphate salvage I                            | pyridoxine                                                                                                                                                                                            |
| pyrimidine nucleobases salvage I                            | UMP<br>uracil                                                                                                                                                                                         |
| S-methyl-5-thio- $\alpha$ -D-ribose 1-phosphate degradation | 2-oxoglutaramate<br>2-oxoglutarate<br>L-methionine<br>4-(methylsulfanyl)-2-oxobutanoate<br>L-glutamine<br>formate                                                                                     |
| sorbitol biosynthesis II                                    | D-gluconate<br>keto-D-fructose                                                                                                                                                                        |

Supplementary Table S4 (continued).



| Pathways                                               | Covered Compounds                                                                                                                                                                                                                                                                                                      |
|--------------------------------------------------------|------------------------------------------------------------------------------------------------------------------------------------------------------------------------------------------------------------------------------------------------------------------------------------------------------------------------|
| stearate biosynthesis II (bacteria and plants)         | stearate<br>AMP                                                                                                                                                                                                                                                                                                        |
| superpathway of $\beta$ -D-glucuronosides degradation  | aldehydo-D-glucuronate<br>pyruvate<br>2-dehydro-2-deoxy-D-gluconate<br><br>D-mannonate                                                                                                                                                                                                                                 |
| superpathway of branched chain amino acid biosynthesis | 2-oxobutanoate<br>L-threonine<br>pyruvate<br>(S)-2-aceto-2-hydroxybutanoate<br><br>2-oxoglutarate<br>L-isoleucine<br>L-glutamate<br>(S)-2-methyl-2-oxopentanoate<br><br>(S)-2-acetolactate<br><br>(2R)-2,2-dihydroxy-2-methylbutanoate<br>L-valine<br>2-methyl-2-oxobutanoate<br>4-methyl-2-oxopentanoate<br>L-leucine |
| superpathway of L-isoleucine biosynthesis I            | 2-oxobutanoate<br>L-threonine<br>pyruvate<br>(S)-2-aceto-2-hydroxybutanoate<br>2-oxoglutarate<br>L-isoleucine<br>L-glutamate<br>(S)-2-methyl-2-oxopentanoate<br><br>O-phospho-L-homoserine<br><br>L-homoserine<br>L-aspartate-semialdehyde<br>L-aspartyl-4-phosphate<br>L-aspartate, oxaloacetate                      |

Supplementary Table S4 (continued).

| Pathways                                                             | Covered Compounds                                                                                                                                                                                                                   |
|----------------------------------------------------------------------|-------------------------------------------------------------------------------------------------------------------------------------------------------------------------------------------------------------------------------------|
| superpathway of L-methionine biosynthesis (by sulfhydrylation)       | sulfate<br>L-homocysteine<br>L-methionine<br>L-homoserine<br><i>O</i> -acetyl-L-homoserine<br><br>acetate<br>L-aspartate-semialdehyde<br>L-aspartyl-4-phosphate<br>L-aspartate<br>2-oxoglutarate<br><br>oxaloacetate<br>L-glutamate |
| superpathway of pyrimidine deoxyribonucleotides de novo biosynthesis | L-glutamine<br>L-glutamate<br><br>UMP<br><br>orotate<br><i>N</i> -carbamoyl-L-aspartate<br>L-aspartate                                                                                                                              |
| superpathway of sulfate assimilation and cysteine biosynthesis       | 2-phospho-L-serine<br>L-serine<br>2-phospho-D-glycerate<br>2-oxoglutarate<br>L-glutamate<br><i>O</i> -acetyl-L-serine<br>L-cysteine<br>acetate<br>sulfate                                                                           |

Supplementary Table S4 (continued).

| Pathways                                                                           | Covered Compounds                                                                                           |
|------------------------------------------------------------------------------------|-------------------------------------------------------------------------------------------------------------|
| superpathway of tetrahydrofolate biosynthesis                                      | 4-aminobenzoate<br>pyruvate<br>L-glutamine<br>chorismate<br>L-glutamate<br><br>formate<br>AMP               |
| taurine degradation IV                                                             | 2-oxoglutarate<br>taurine<br>succinate                                                                      |
| tetrapyrrole biosynthesis I (from glutamate)                                       | L-glutamate<br>AMP<br>5-aminolevulinate                                                                     |
| trehalose degradation VI (periplasmic)                                             | $\alpha$ -D-glucopyranose<br><br>$\beta$ -D-glucopyranose                                                   |
| UDP-N-acetylmuramoyl-pentapeptide biosynthesis I (meso-diaminopimelate containing) | D-alanine<br><i>meso</i> -diaminopimelate<br>L-glutamate<br>D-glutamate<br>L-alanine<br>phosphoenolpyruvate |
| UTP and CTP dephosphorylation I                                                    | CMP<br>UMP<br>cytidine<br>uridine<br>L-glutamine<br>L-glutamate                                             |

## B. Pathway Analyses on MetaboAnalyst

The additional pathways identified in *Pseudomonas putida* KT2440 using annotated metabolites in our study are shown in the figures below (Please see figure 3 in main paper for additional details).

### Aminoacyl-tRNA biosynthesis

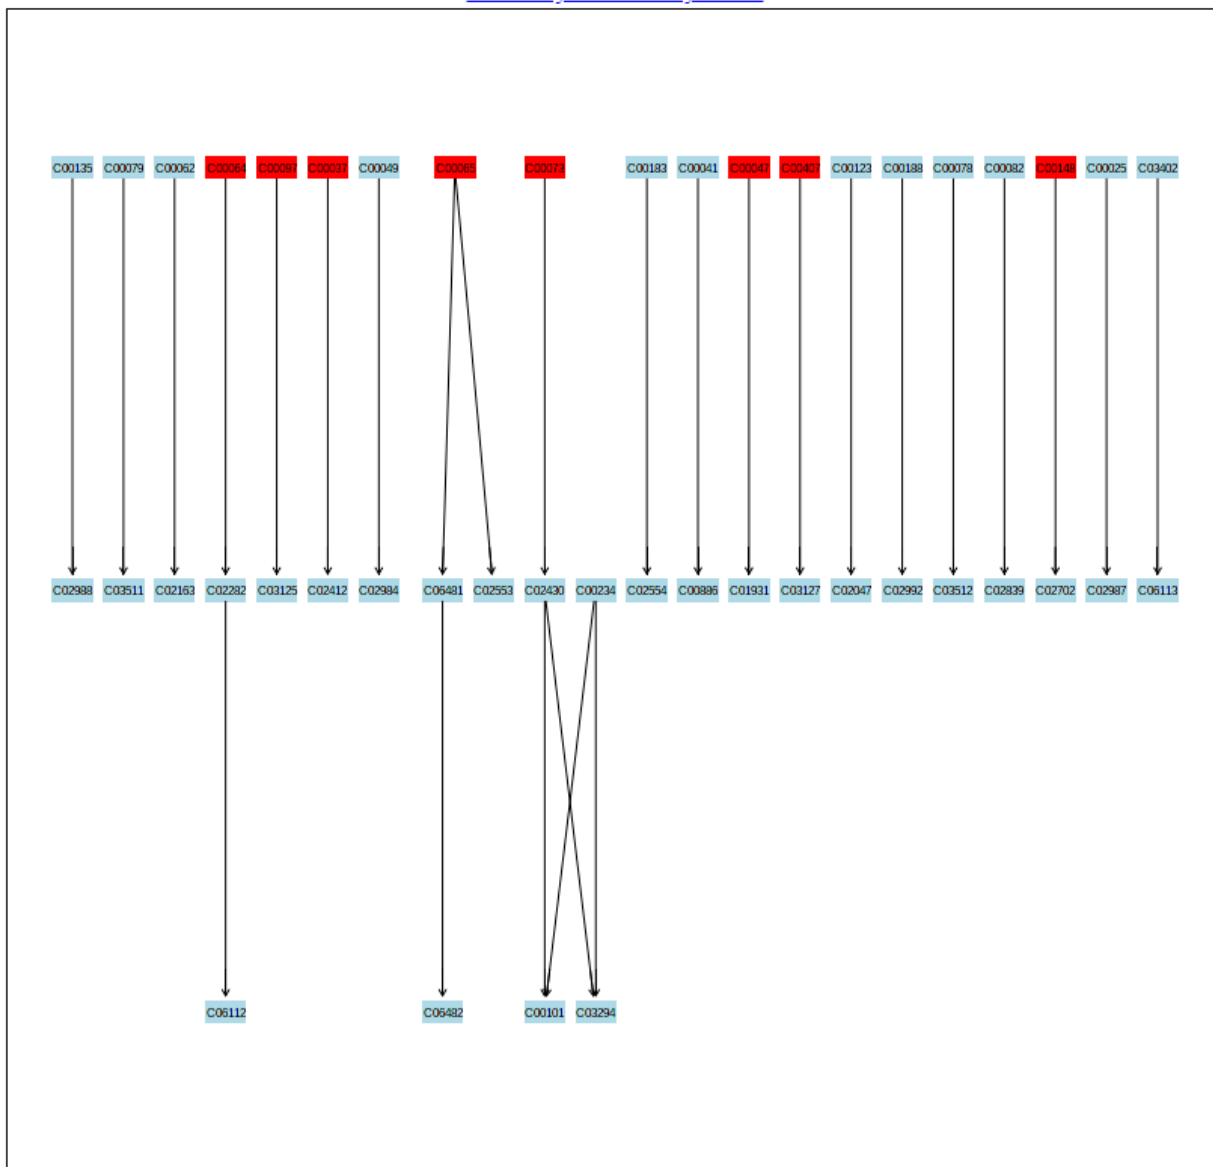

C00064: L-Glutamine; C00097: L-Cysteine; C00027: Glycine; C00065: L-Serine; C00072: L-Methionine; C00047: Lysine; C00407: Isoleucine; C00148: L-Proline

Supplementary Figure S2a(i). Metabolites putatively identified in *X. perforans* that are involved in aminoacyl tRNA biosynthesis

Pyrimidine metabolism

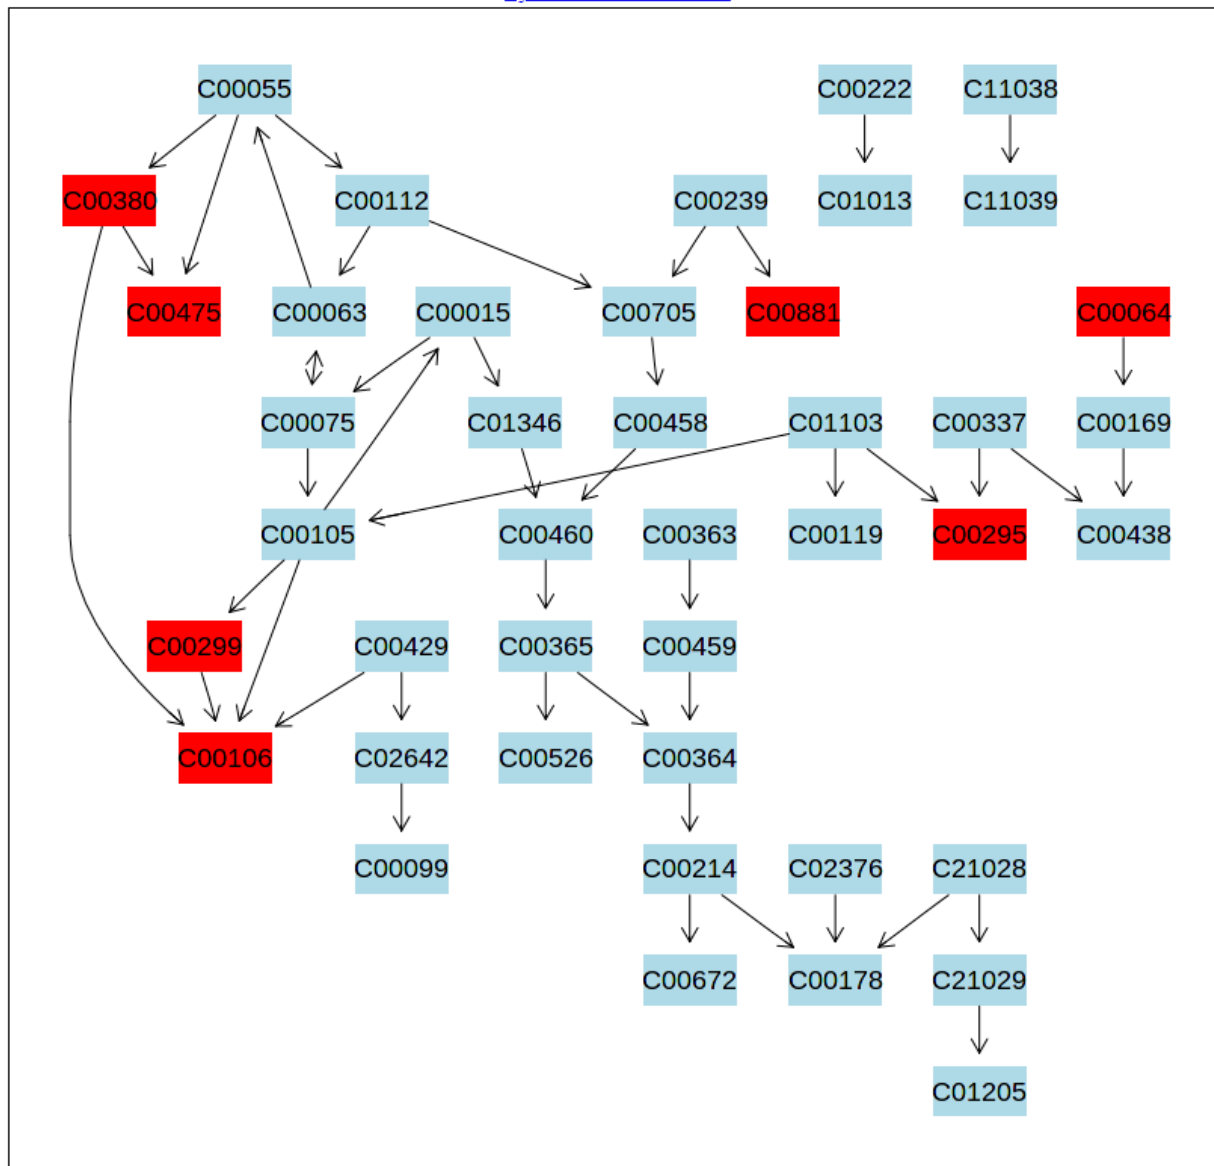

C00280: Cytosine, C00475: Cytidine; C00881: Deoxycitidine; C00064: L-Glutamine; C00295: Orotate; C00299: Uridine, C00106: Uracil

Supplementary Figure S2a(ii). Metabolites putatively identified in *X. perforans* that are involved in pyrimidine metabolism

### Glycine, serine and threonine metabolism

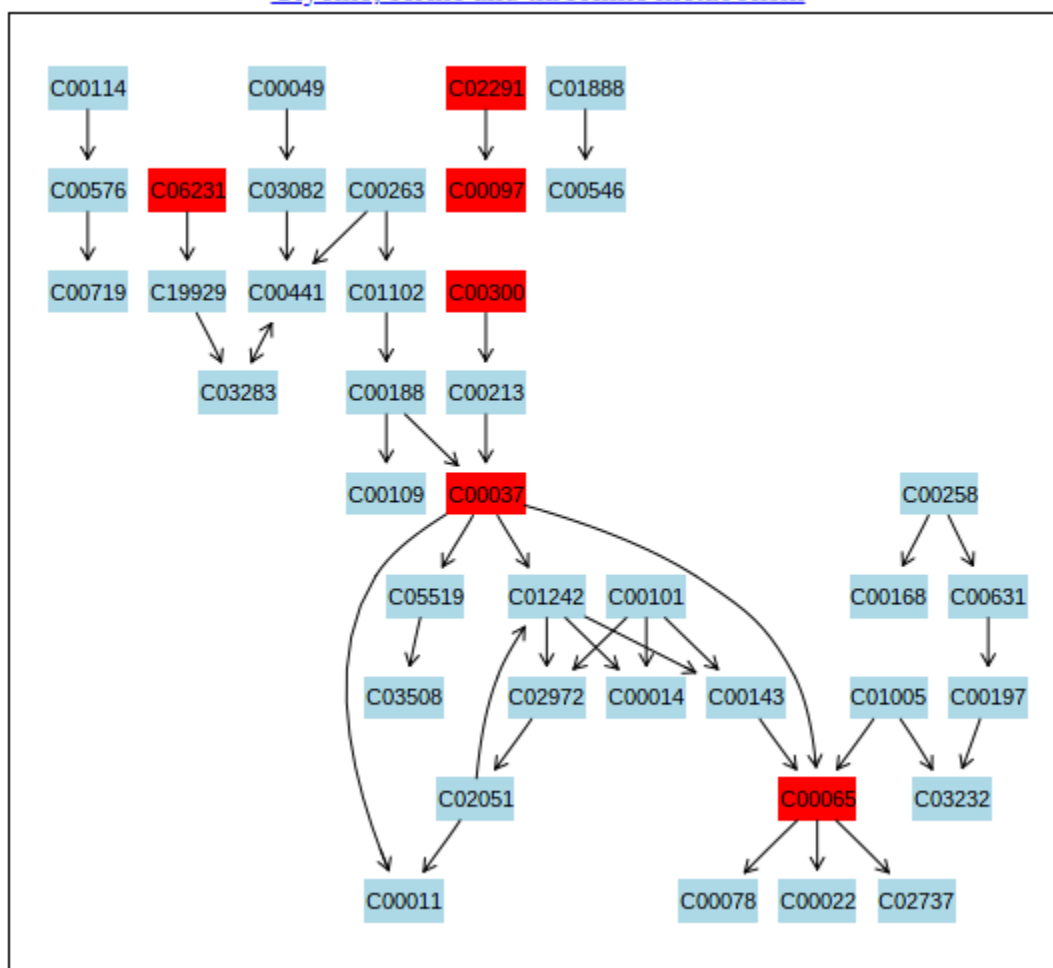

C02291: L-cystathionine, C06221: Ectoine, C00097: Cysteine, C00200: Creatine, C00065: L-Serine

Supplementary Figure S2a(iii). Metabolites putatively identified in *X. perforans* that are involved in glycine, serine and threonine metabolism

### Cyanoamino acid metabolism

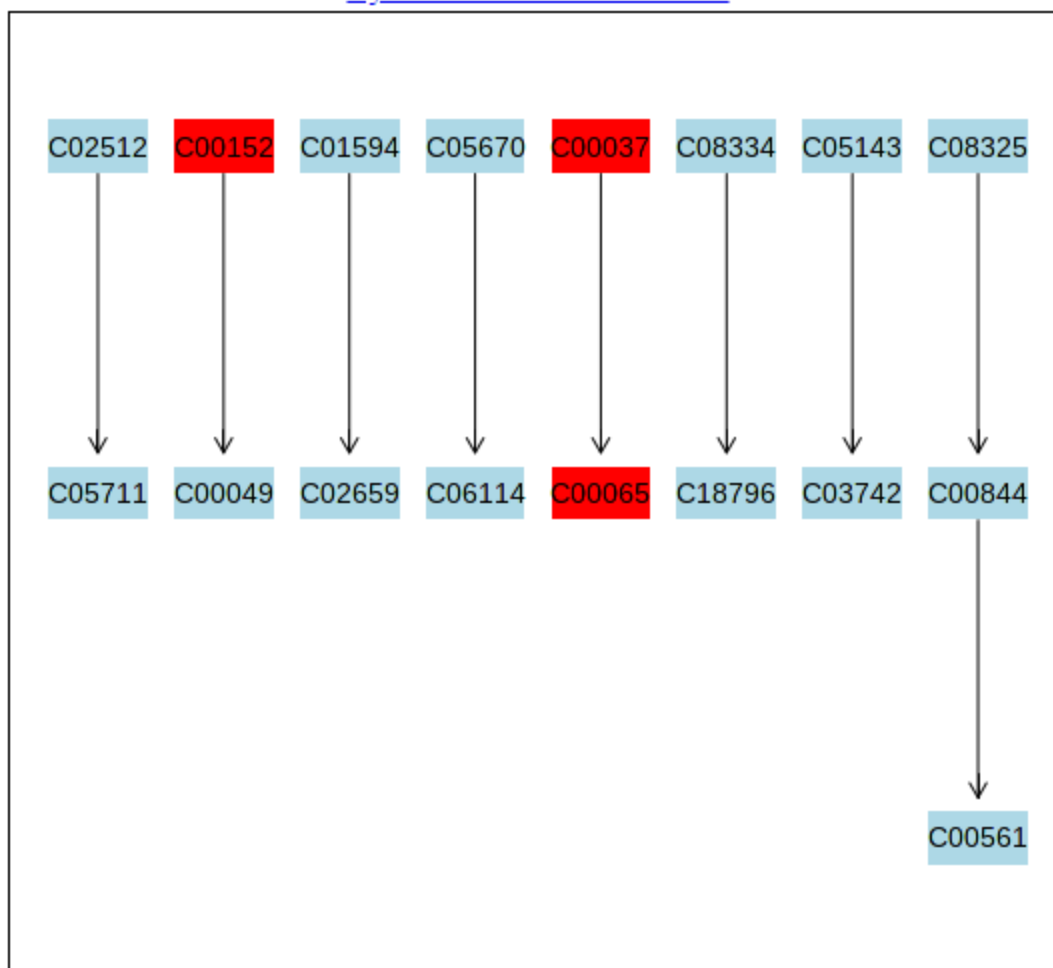

C00152: L-Asparagine, C00027: Glycine, C00065: L-serine

Supplementary Figure S2a(iv). Metabolites putatively identified in *X. perforans* that are involved in cyanoamino acid metabolism



### Arginine biosynthesis

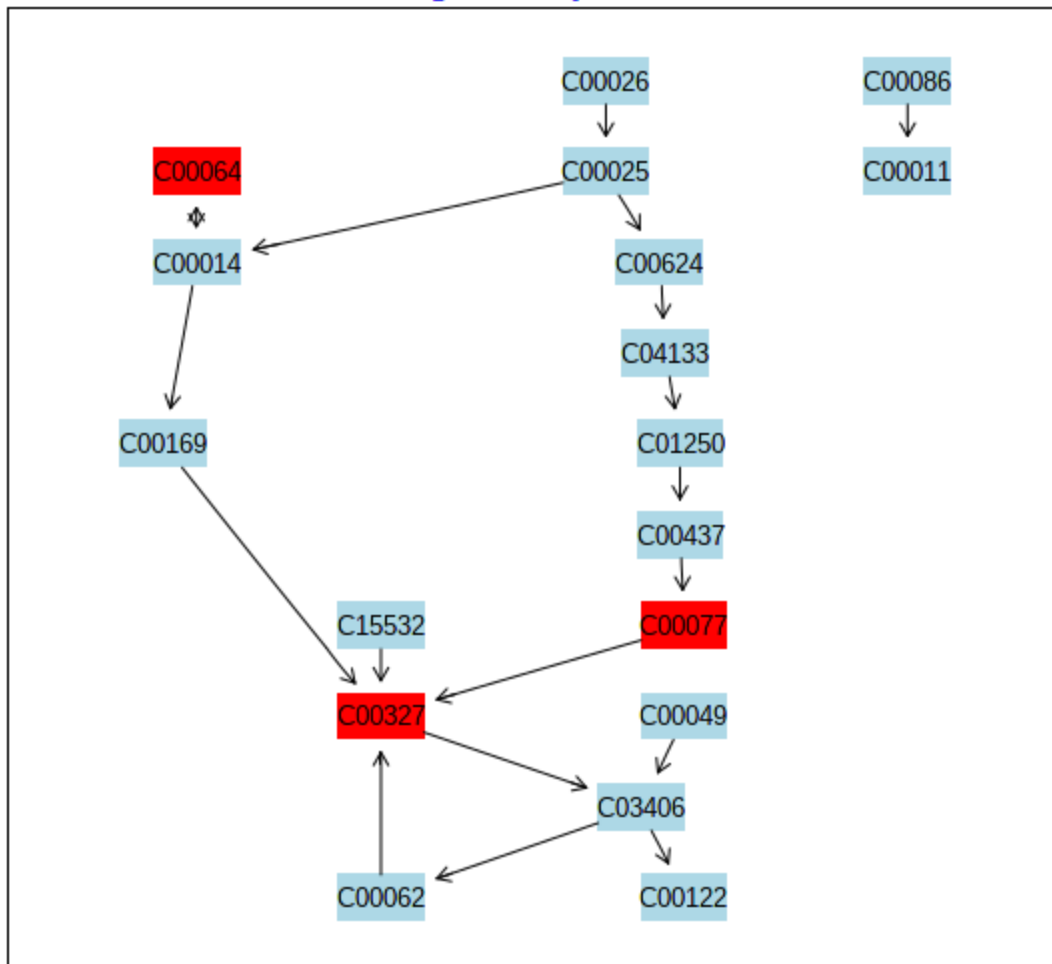

C0064: L-Glutamine, C00227: L-Citrulline, C00077: L-Ornithine

Supplementary Figure S2a (v). Metabolites putatively identified in *X. perforans* that are involved in arginine biosynthesis

### Cysteine and methionine metabolism

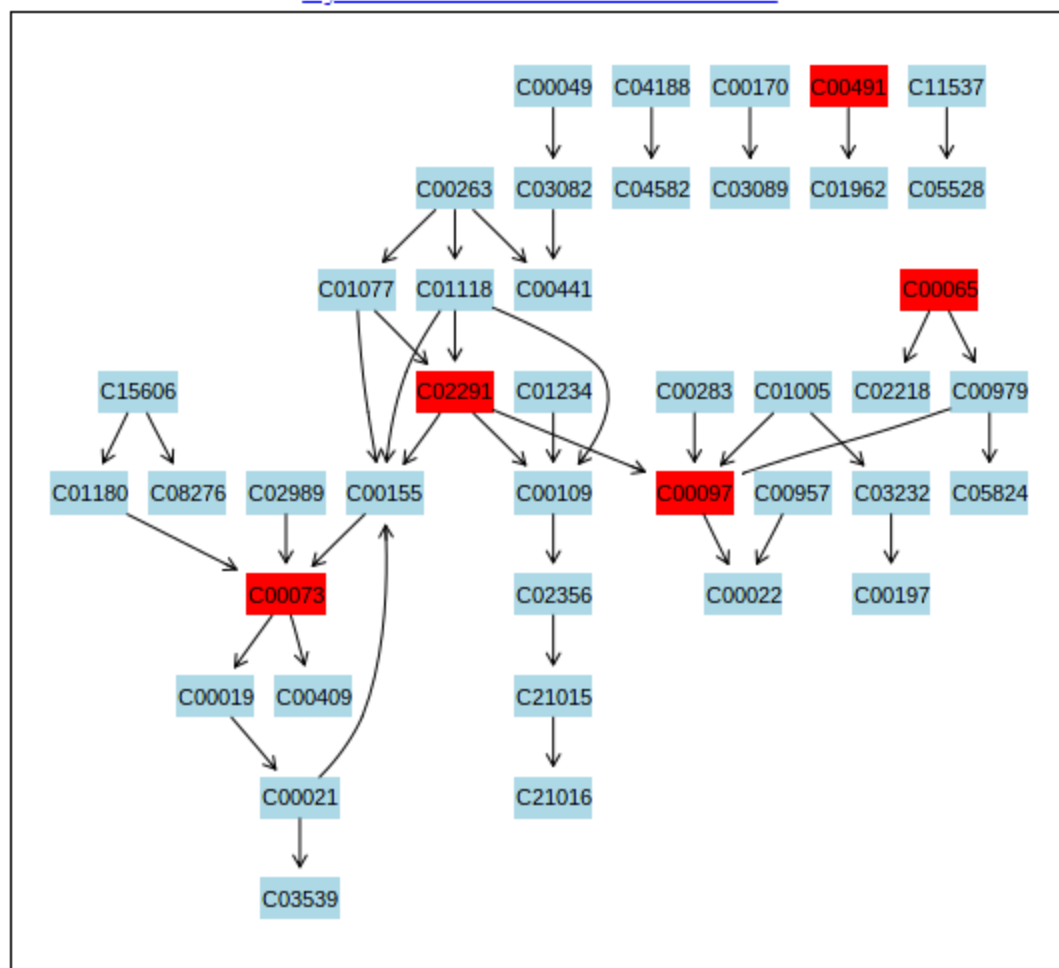

C00491: L-Cystine, C00065: L-Serine, C02291: L-Cystathionine, C00097: L-Cysteine, C00072: L-Methionine

Supplementary Figure S2a (vi). Metabolites putatively identified in *X. perforans* that are involved in cysteine and methionine metabolism

### Sulfur metabolism

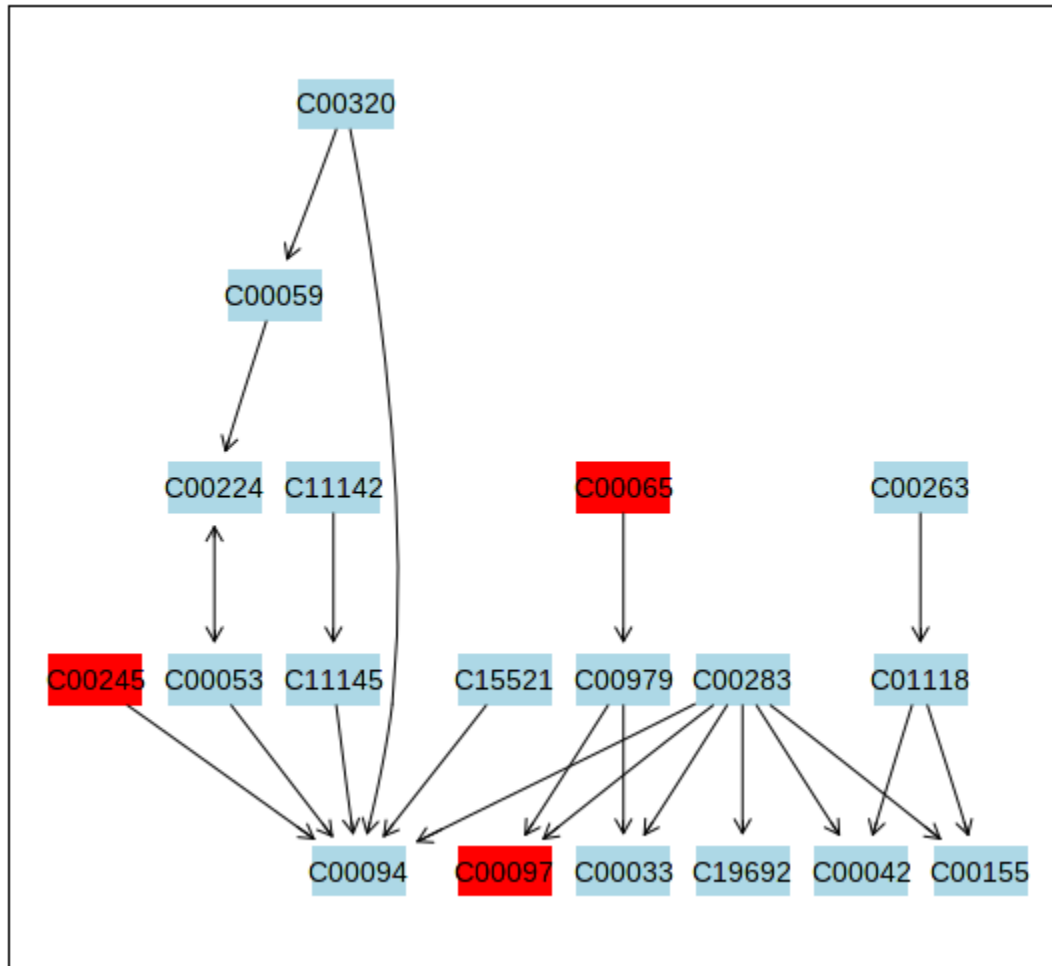

C00065: L-Serine, C00245: Taurine, C00097: L-Cysteine.

Supplementary Figure S2a(vii). Metabolites putatively identified in *X. perforans* that are involved in sulfur metabolism

### Glyoxylate and dicarboxylate metabolism

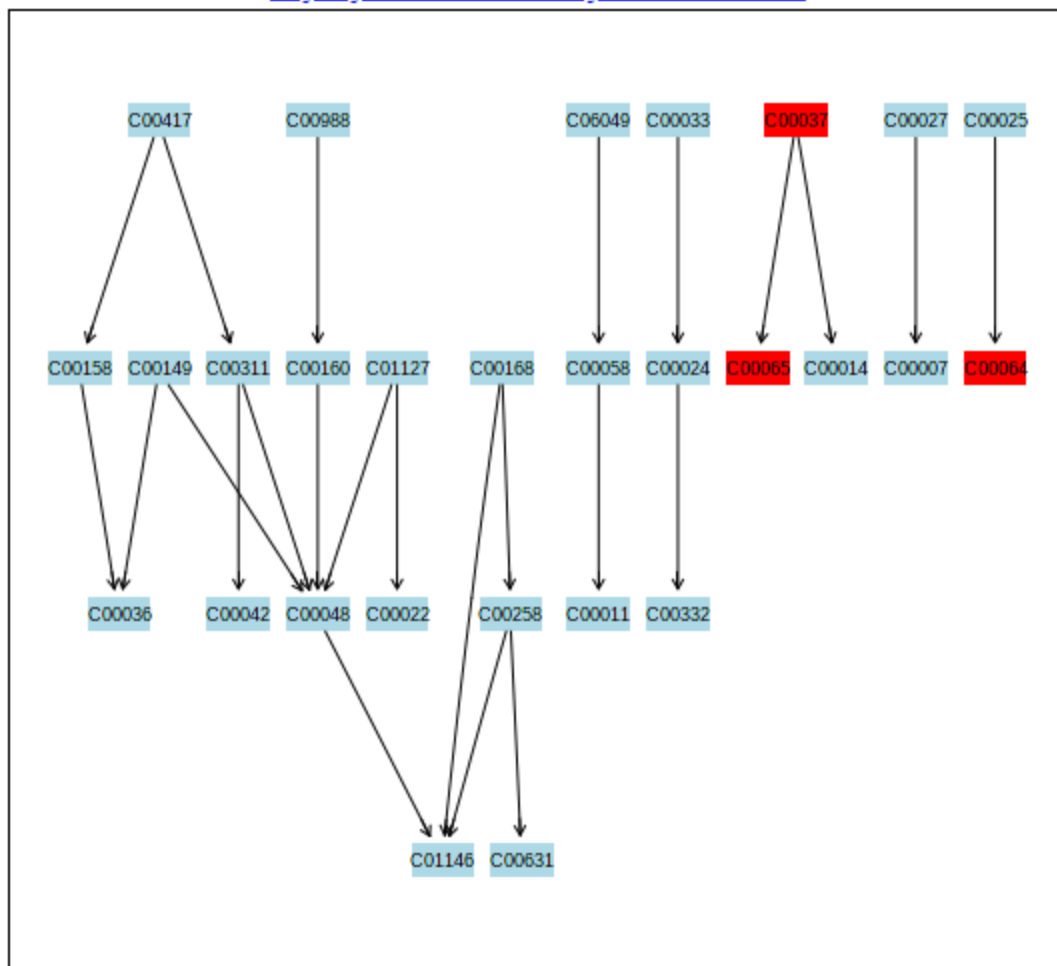

C00027: Glycine, C00065: L-Serine, C00064: L-Glutamine.

Supplementary Figure S2a(viii). Metabolites putatively identified in *X. perforans* that are involved in glyoxylate and dicarboxylate metabolism

### Lysine degradation

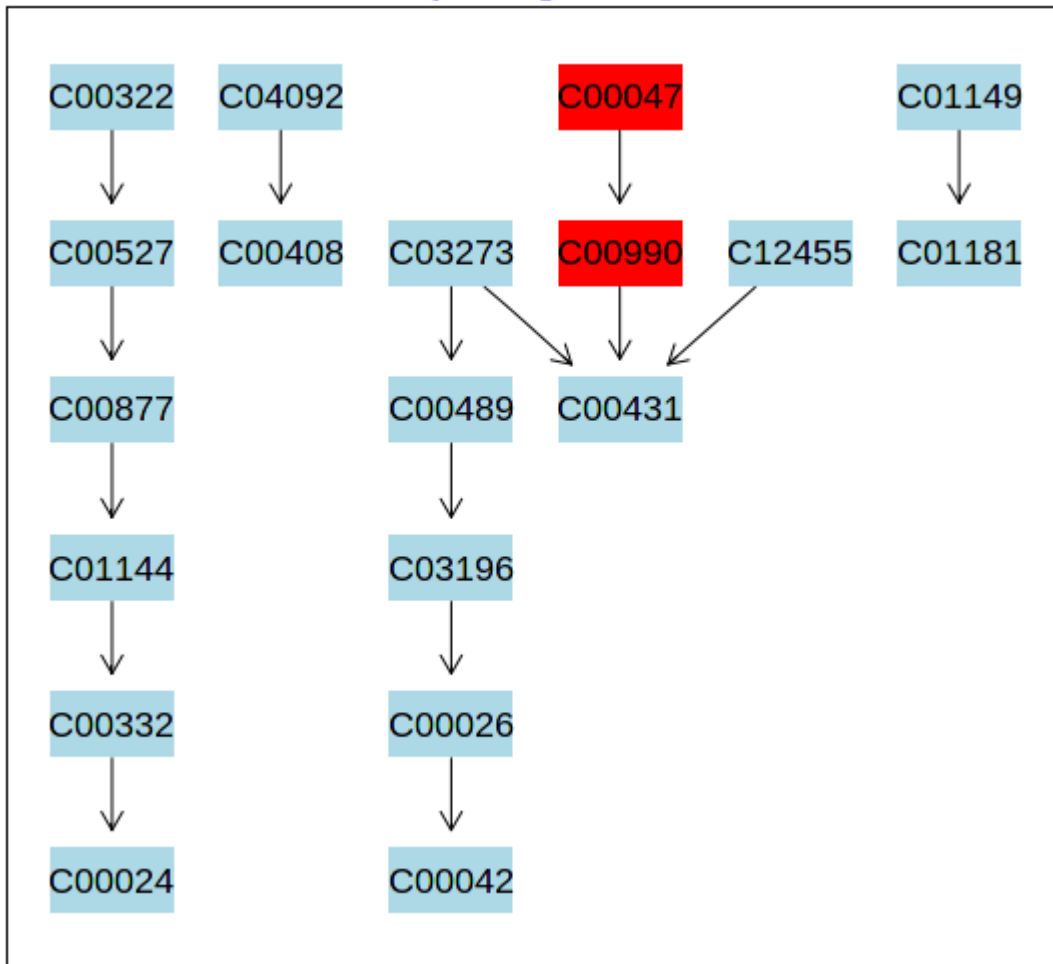

C00047: L-Lysine, C00990: 5-Aminopentanamide.

Supplementary Figure S2a(ix). Metabolites putatively identified in *X. perforans* that are involved in lysine degradation.

### Pantothenate and CoA biosynthesis

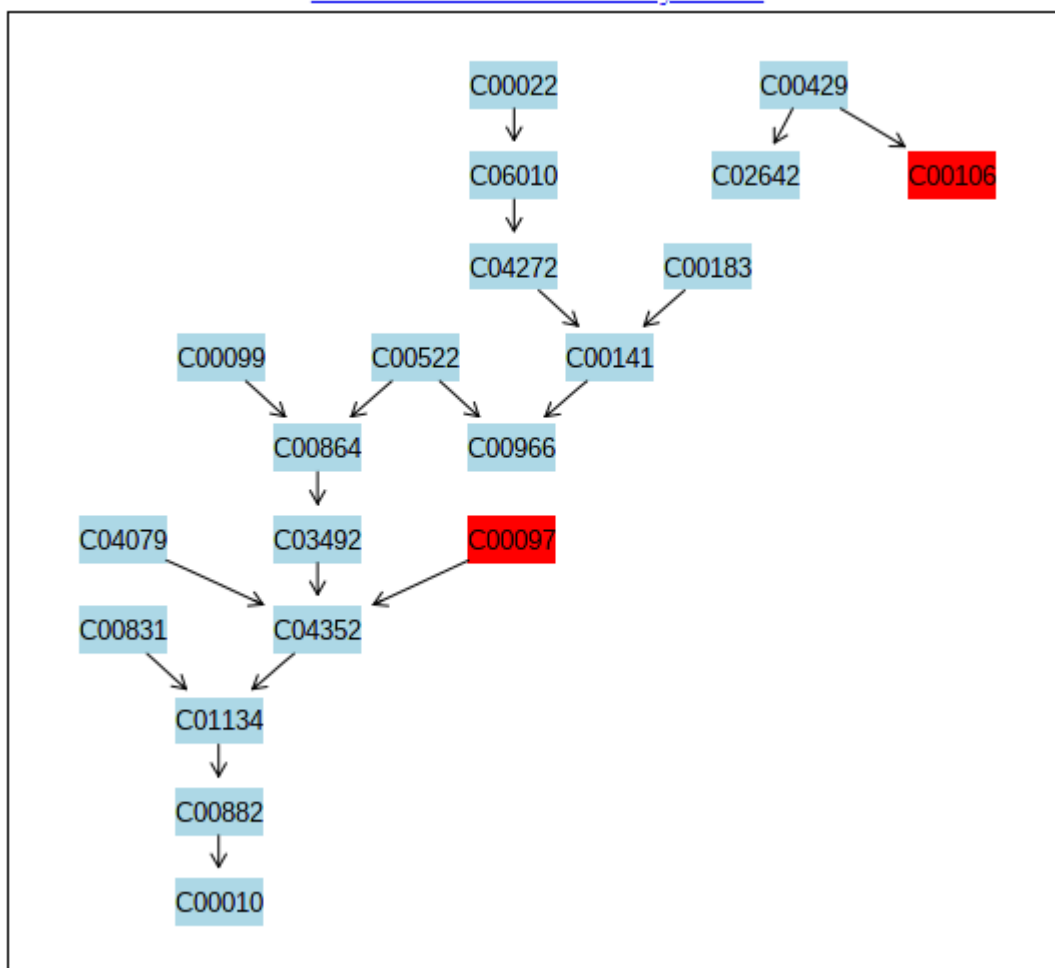

C00106: Uracil, C00097: L-Cysteine

Supplementary Figure S2a (x). Metabolites putatively identified in *X. perforans* that are involved in pantothenate and CoA biosynthesis.

### Alanine, aspartate and glutamate metabolism

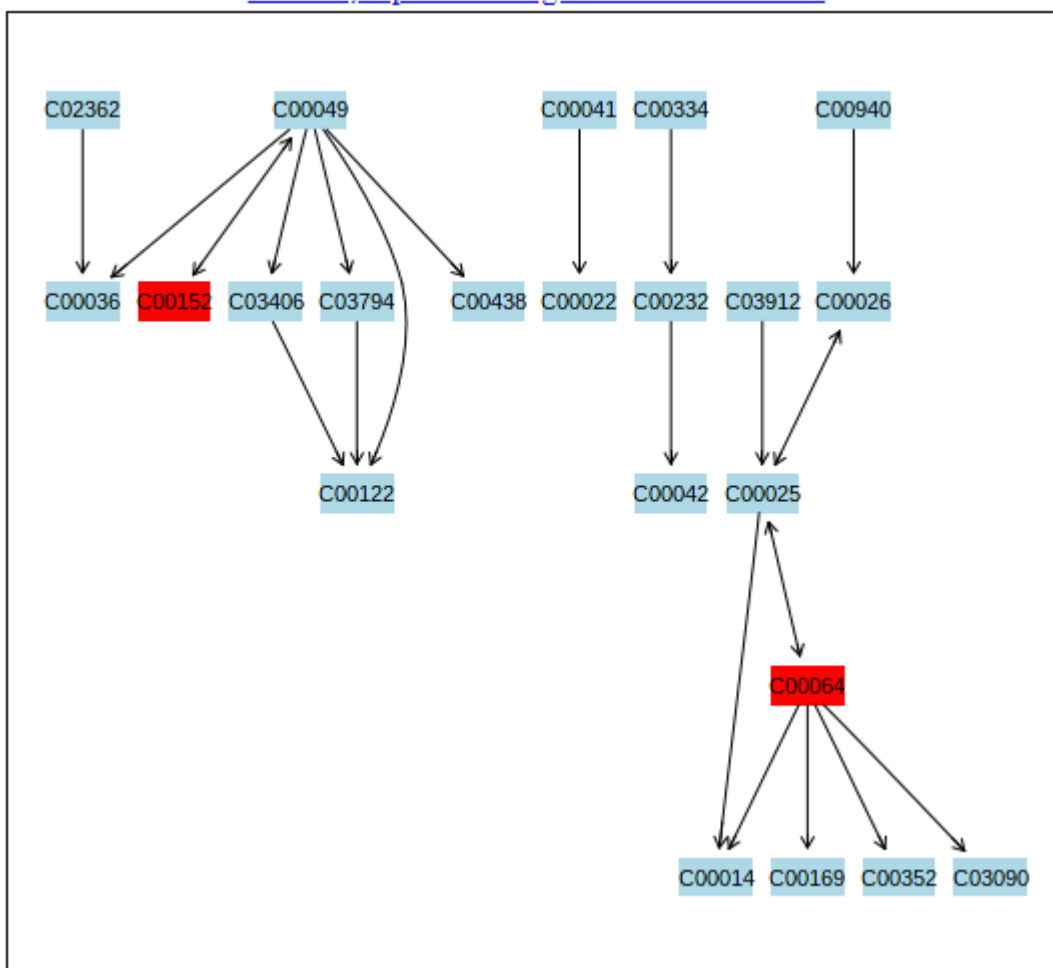

C00152: L-Asparagine, C00064: L-Glutamine

Supplementary Figure S2a(xii). Metabolites putatively identified in *X. perforans* that are involved in alanine, aspartate and glutamate metabolism.

### Methane metabolism

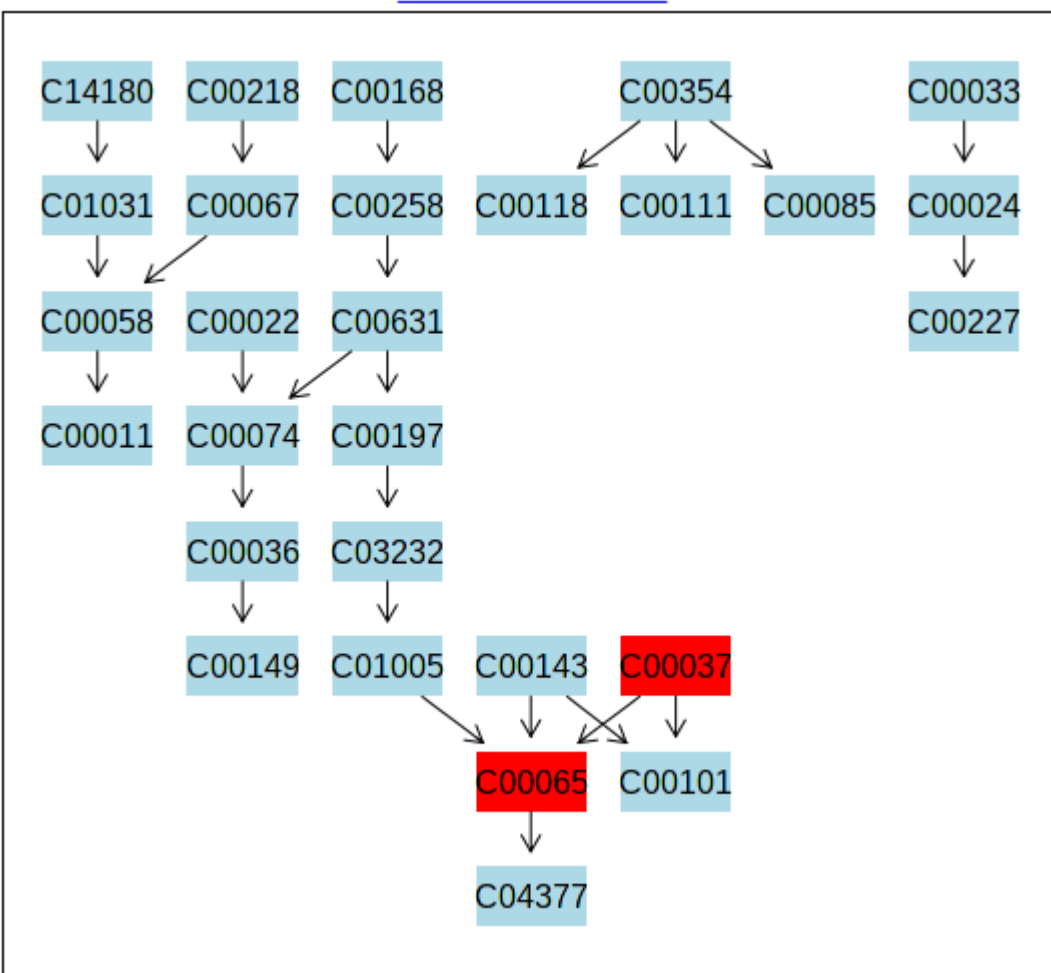

C00027: Glycine, C00065: L-Serine

Supplementary Figure S2a (xii). Metabolites putatively identified in *X. perforans* that are involved in methane metabolism.



## NEGATIVE PHASE SIGNIFICANT METABOLITES AND PATHWAYS

Metabolites putatively identified in *X. perforans* that are involved

Metabolites putatively identified in *X. perforans* that are involved

## Aminoacyl-tRNA biosynthesis

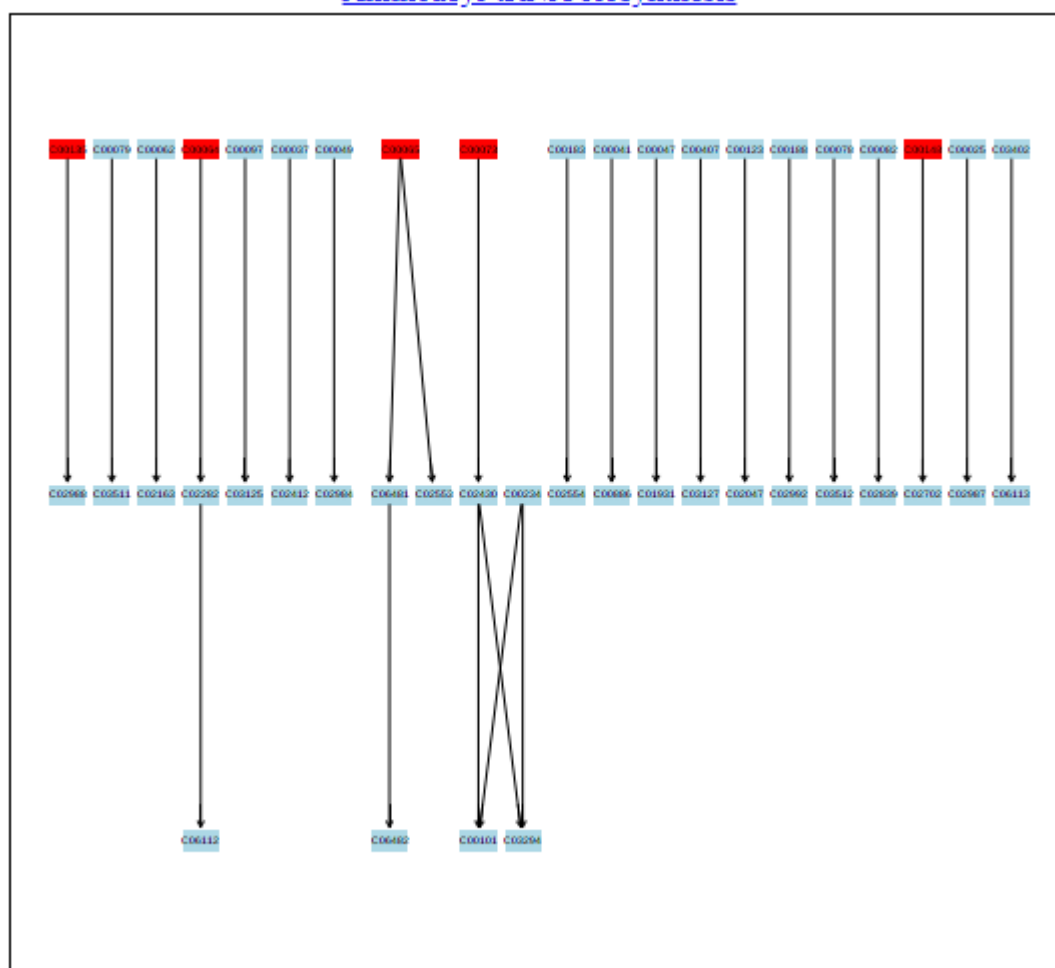

C00125: L-Histamine; C00064: L-Glutamine; C00065: L-Serine; C00072: L-Methionine; C00148: L-Proline

Supplementary Figure S2b(i). Metabolites putatively identified in *X. perforans* that are involved in aminoacyl-tRNA biosynthesis

### Sulfur metabolism

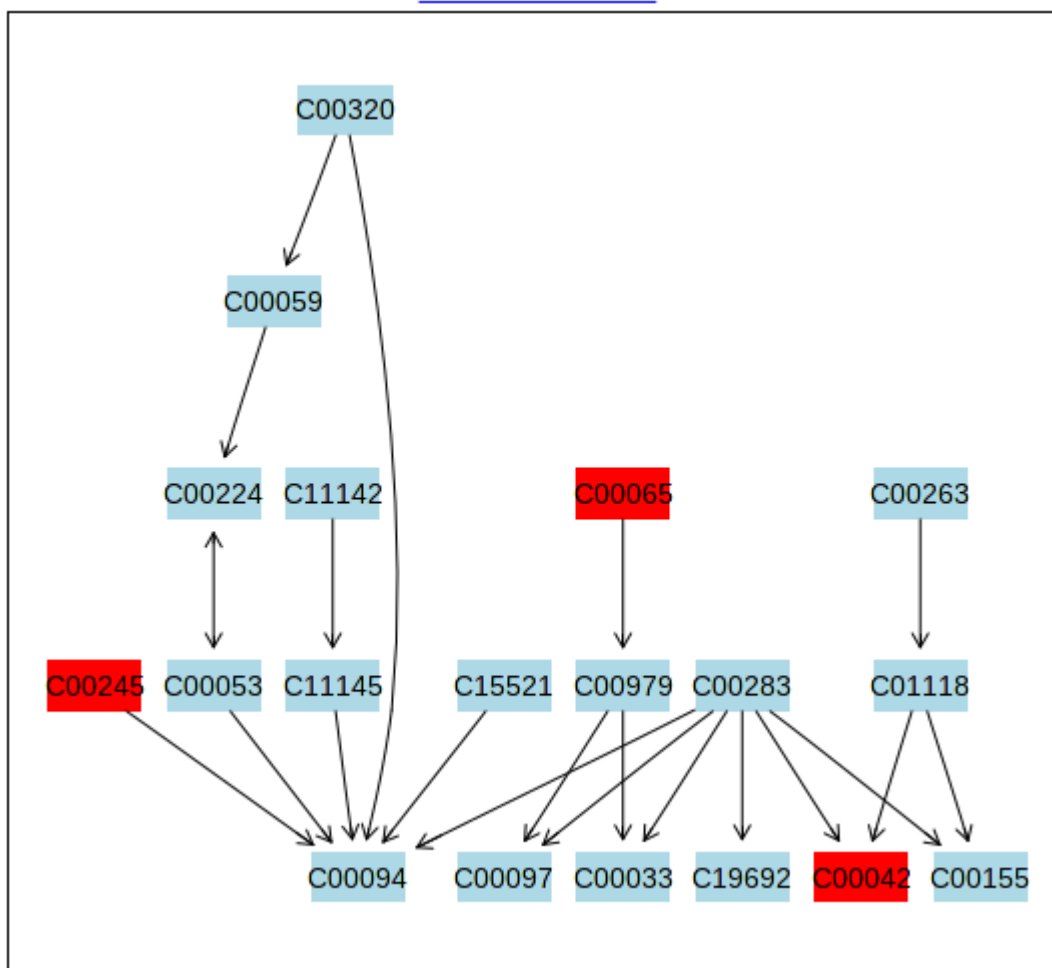

C00065: L-Serine, C00245: Taurine, C00042: Succinate.

Supplementary Figure S2b(ii). Metabolites putatively identified in *X. perforans* that are involved in sulfur metabolism

### Pantothenate and CoA biosynthesis

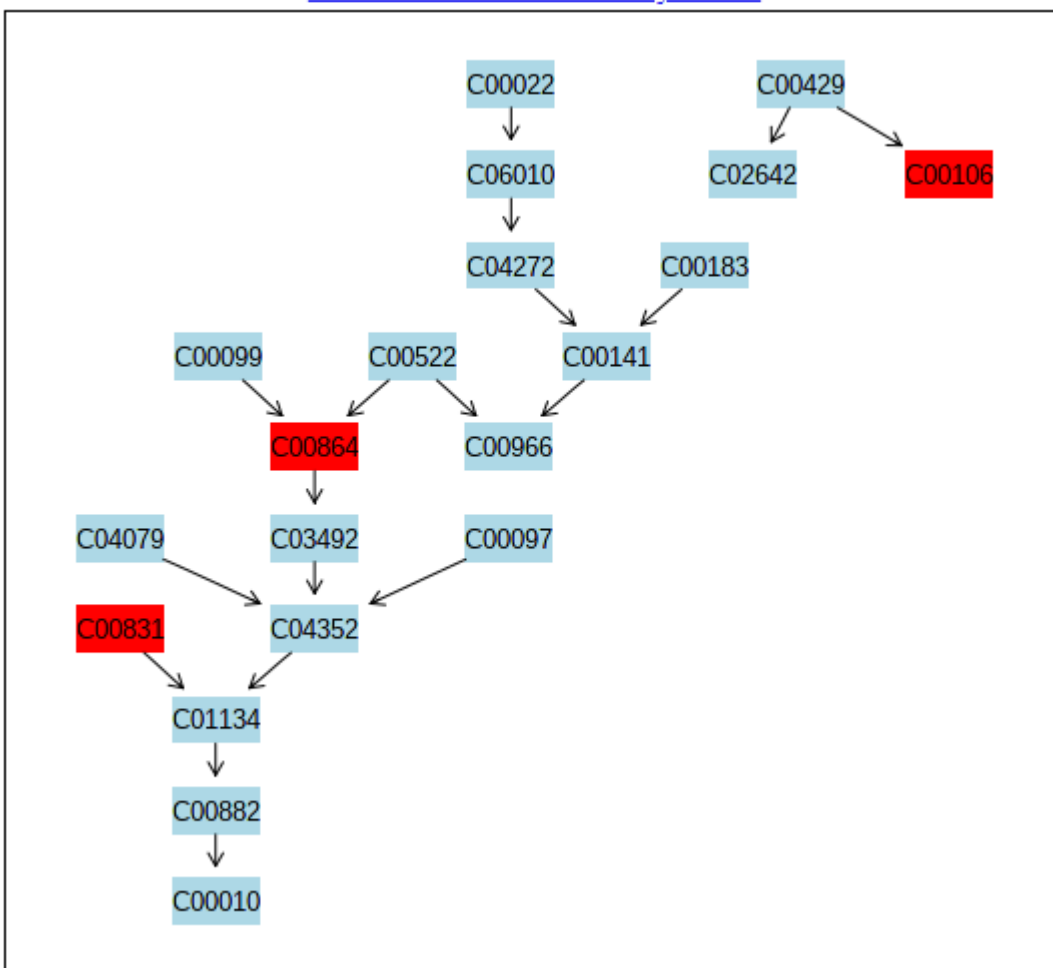

C00106: Uracil, C00864: Pantothenate C00821: Pantetheine

Supplementary Figure S2b(iii). Metabolites putatively identified in *X. perforans* that are involved in pantothenate and CoA biosynthesis

### Alanine, aspartate and glutamate metabolism

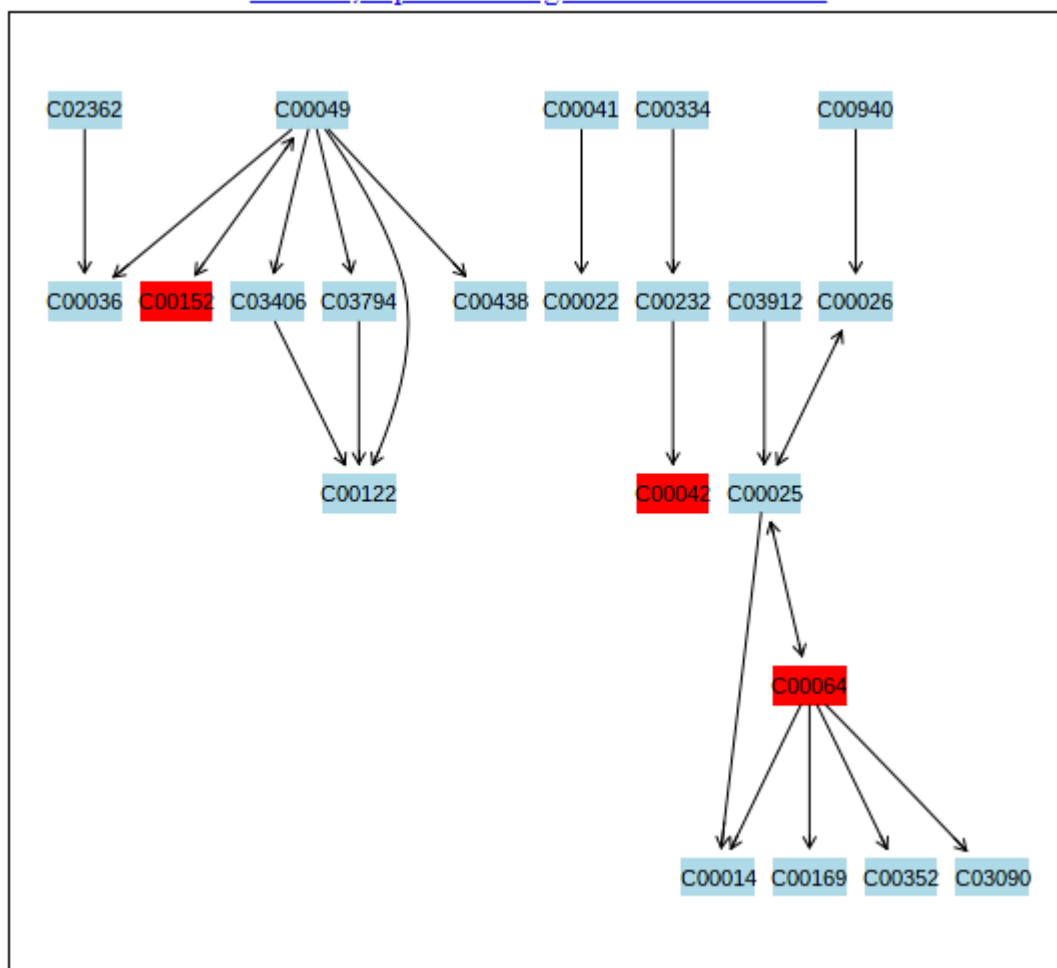

C00152: L-Asparagine, C00042: Succinate C00064: L-Glutamine

Supplementary Figure S2b(iv). Metabolites putatively identified in *X. perforans* that are involved in alanine, aspartate and glutamate metabolism

beta-Alanine metabolism

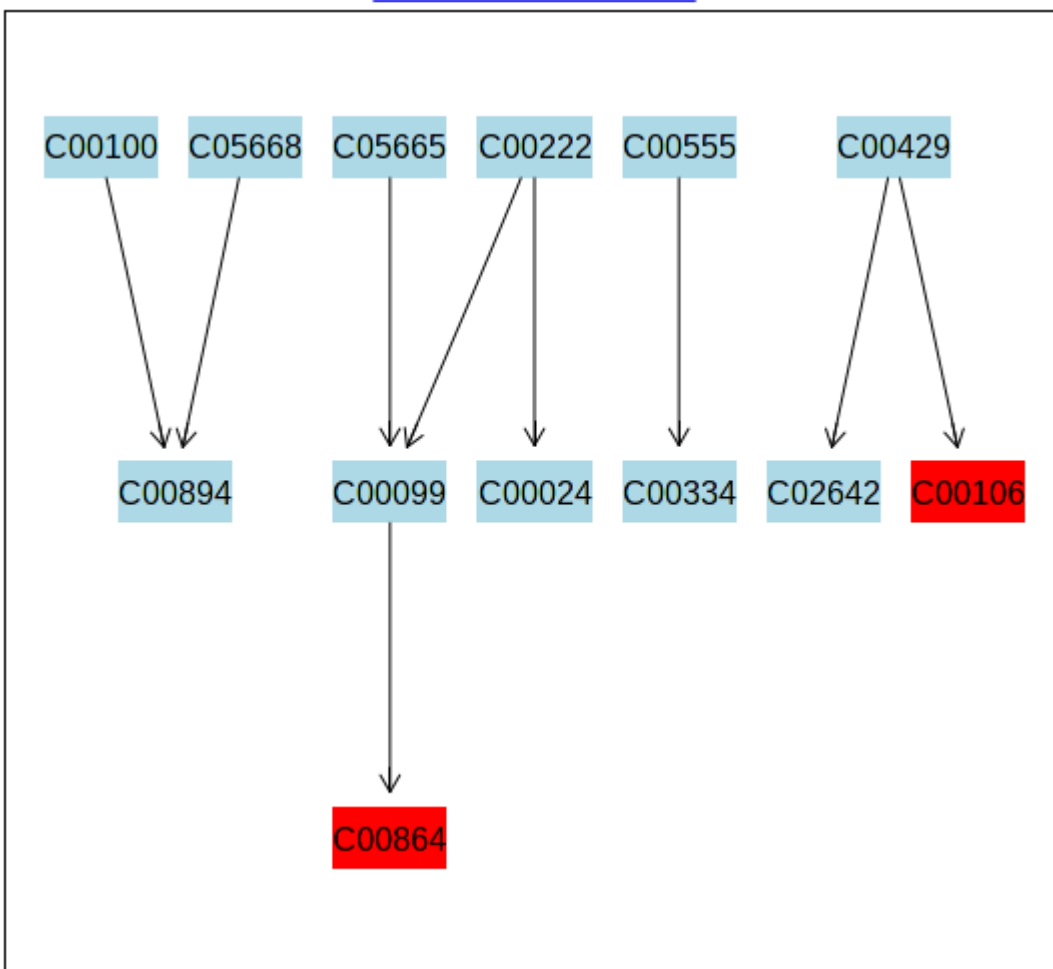

C00106: Uracil, C00864: Pantothenate

Supplementary Figure S2b(v). Metabolites putatively identified in *X. perforans* that are involved in beta-Alanine metabolism

# Purine metabolism

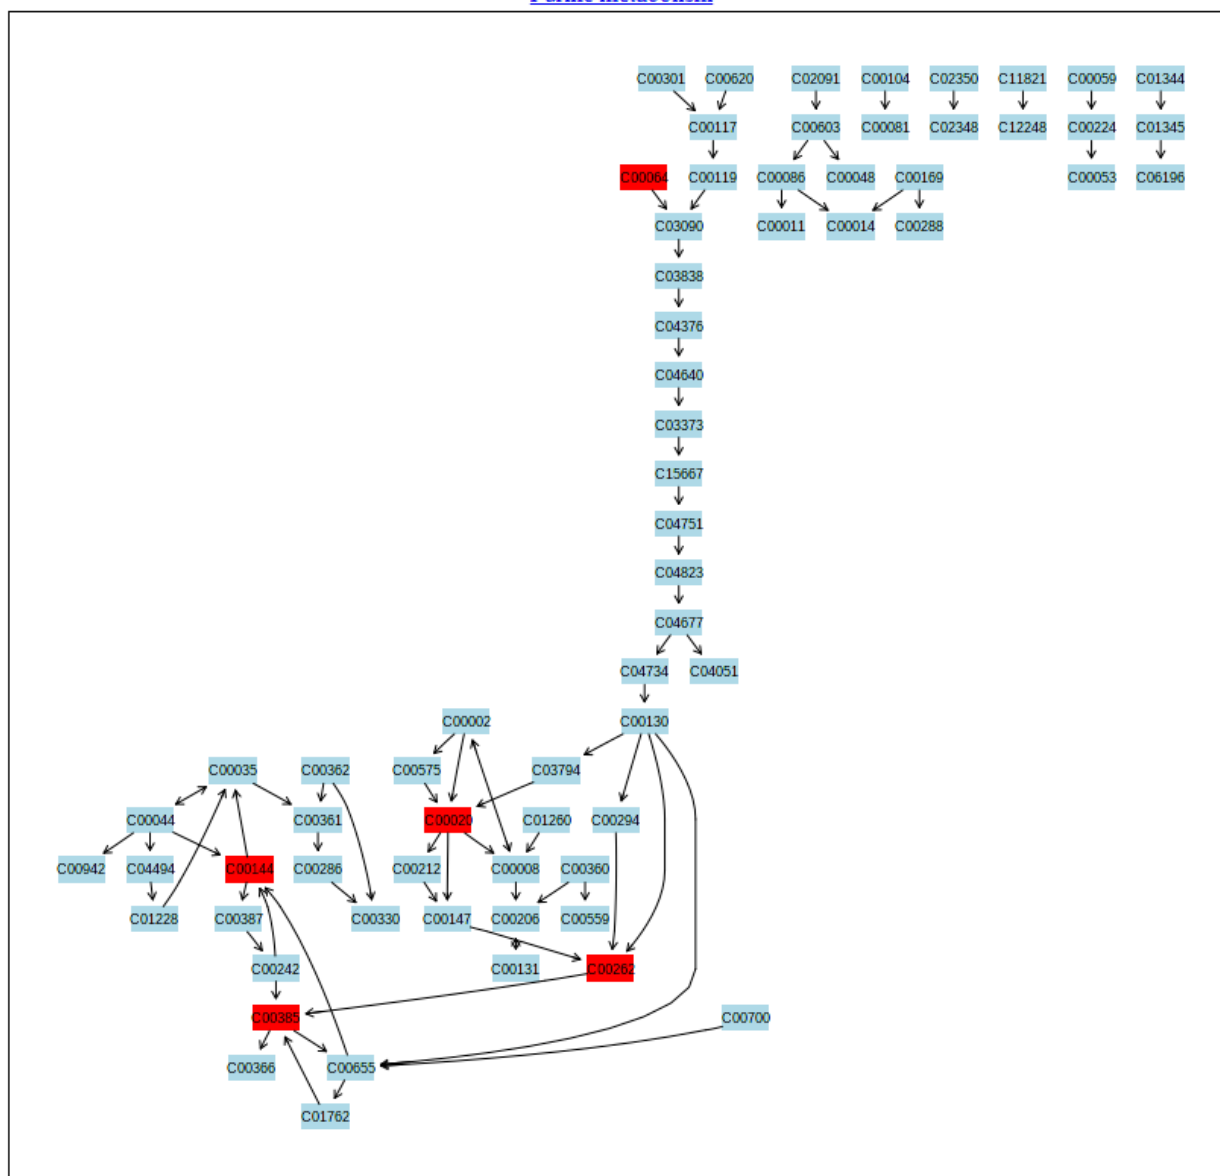

C00064: L-Glutamine, C00020: AMP, C00144: GMP C00262: Hypoxanthine; C00285: Xanthine

Supplementary Figure S2b(vi). Metabolites putatively identified in *X. perforans* that are involved in purine metabolism

Cyanoamino acid metabolism

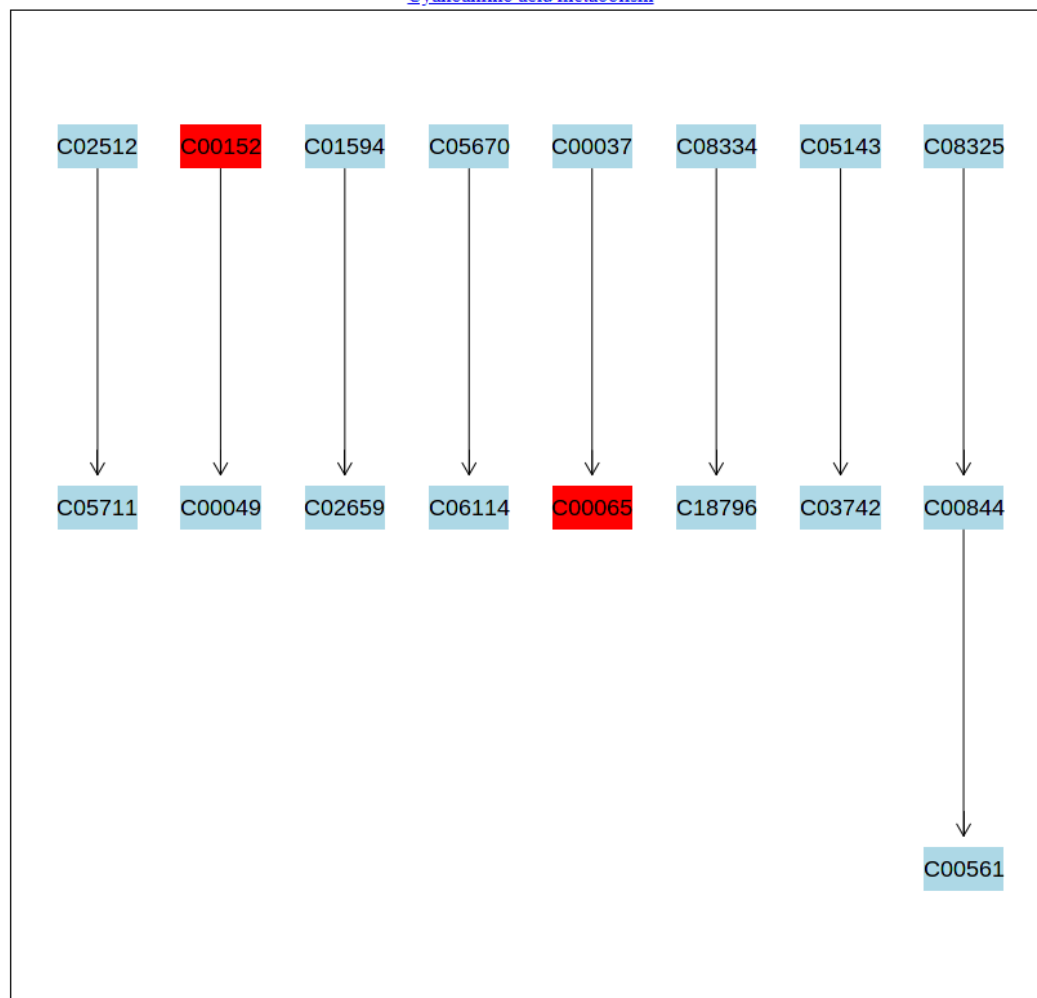

C00152: L-Asparagine, C00065: L-Serine

Supplementary Figure S2b(vii). Metabolites putatively identified in *X. perforans* that are involved in cyanoamino acid metabolism



Arginine biosynthesis

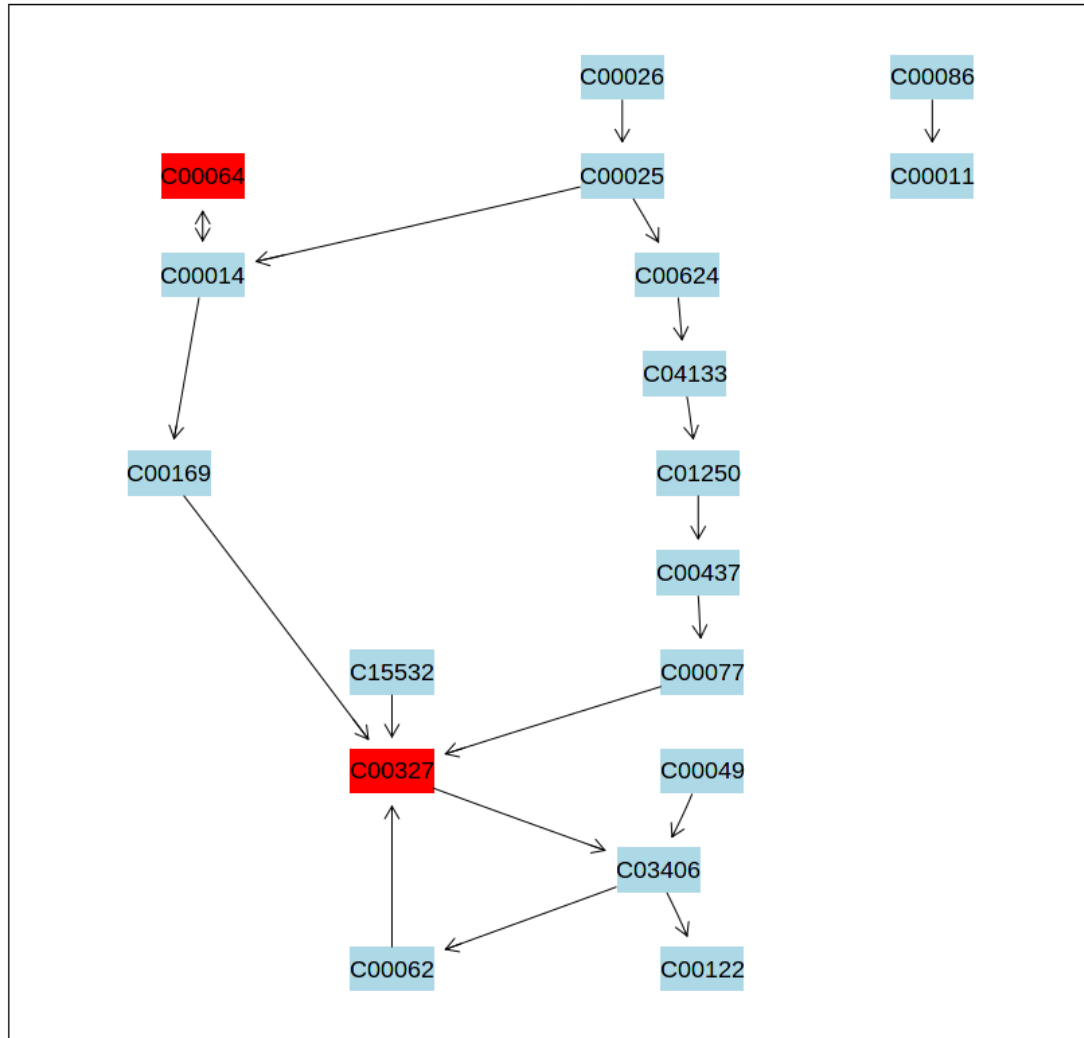

C00064: L-Glutamine, C00227: L-Citrulline

Supplementary Figure S2b(viii). Metabolites putatively identified in *X. perforans* that are involved in arginine biosynthesis

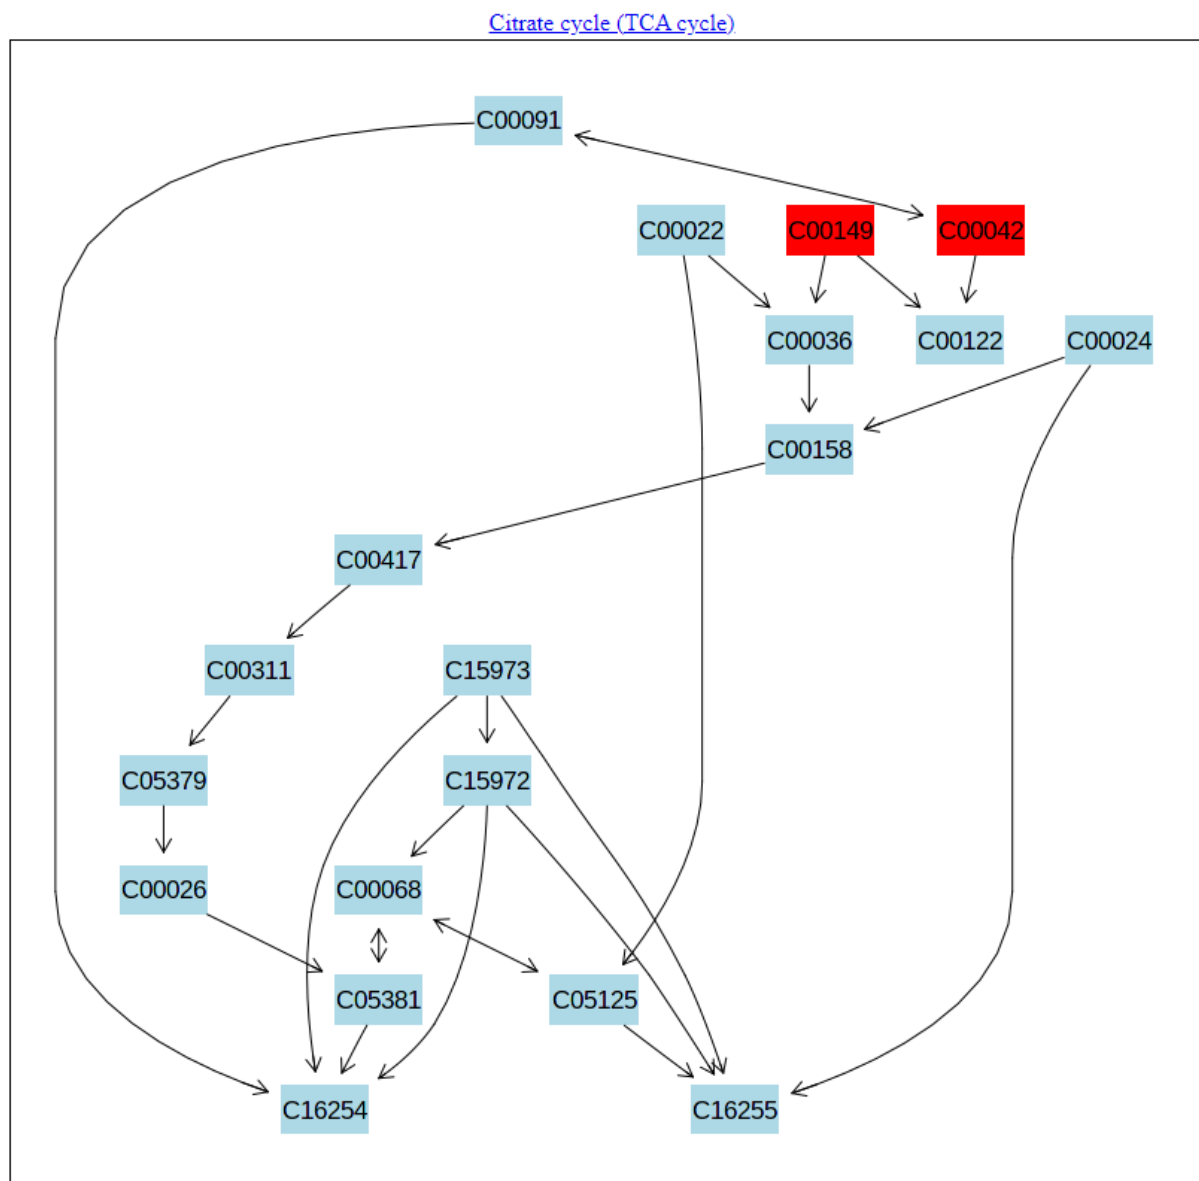

C00149: (S)-Malate, C00042: Succinate

Supplementary Figure S2b(ix). Metabolites putatively identified in *X. perforans* that are involved in TCA cycle.

# Histidine metabolism

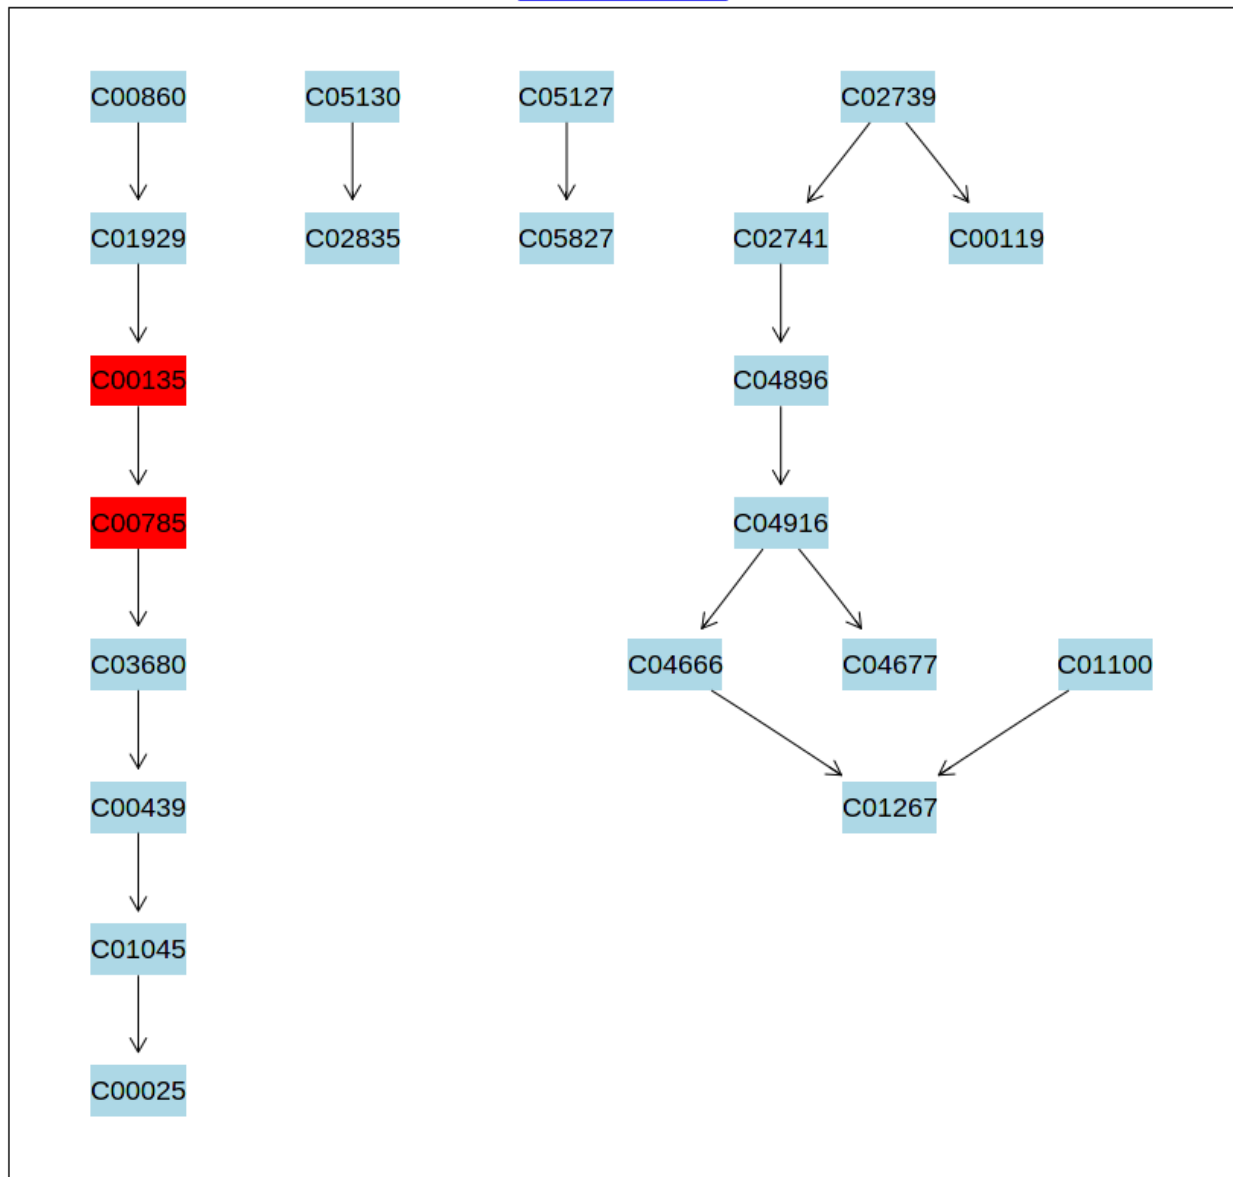

C00125: L-Histidine, C00785: Urocanate

Supplementary Figure S2b(x). Metabolites putatively identified in *X. perforans* that are involved in histidine metabolism.

Cysteine and methionine metabolism

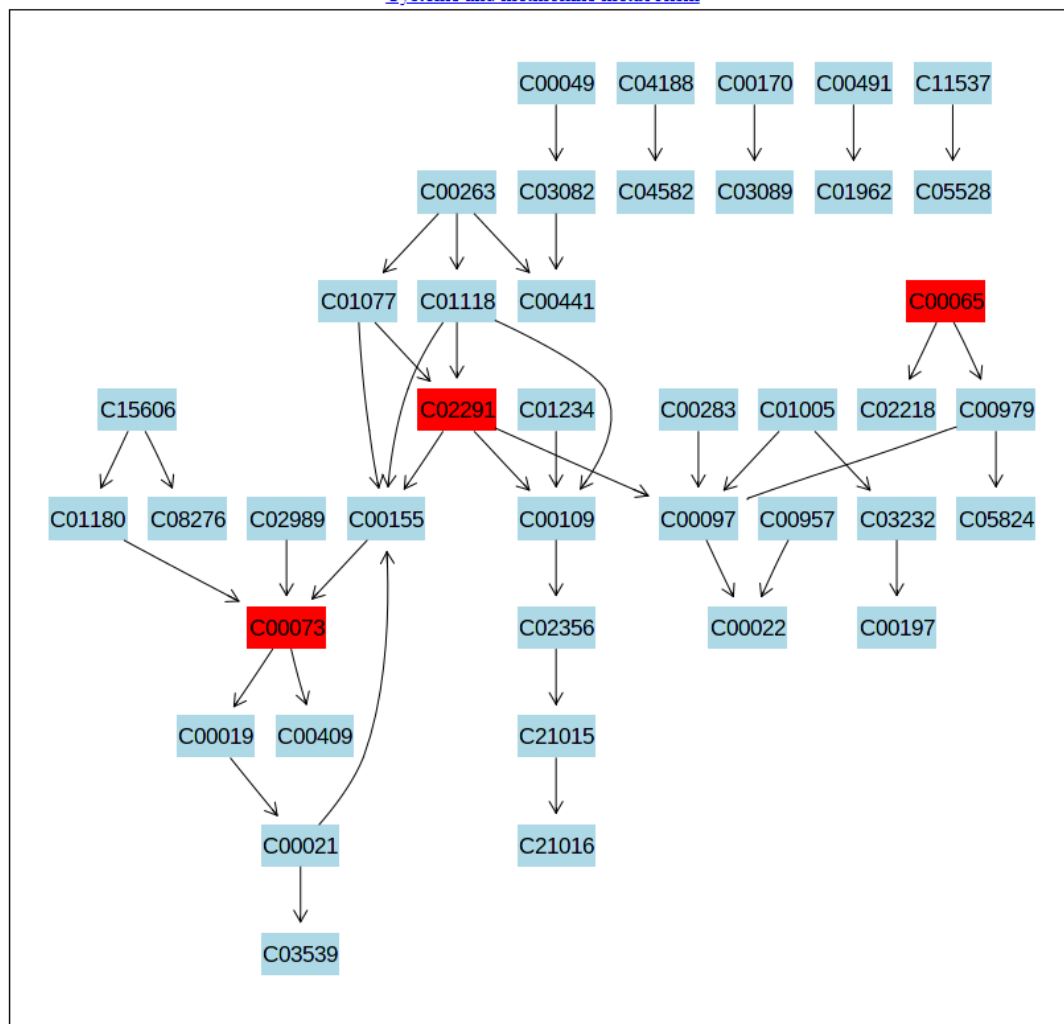

C00065: L-Serine, C02291: L-Cystathionine, C00073: L-Methionine

Supplementary Figure S2b(xi). Metabolites putatively identified in *X. perforans* that are involved in cysteine and methionine metabolism.
