# Supplementary material for: Metabolomics Insights into Chemical Convergence in Xanthomonas perforans and Metabolic Changes Following Treatment with the Small Molecule Carvacrol
Source: MDPI journal article supplement (doi:10.3390/metabo11120879), 2021-12-16
Supplement: s1 [file s1]

### Annotation of Metabolites in *Xanthomonas perforans*

The total identified features in the initial study without carvacrol treatment is 1477 in the positive ion mode and 1094 in the negative ion mode (Supplementary Figure S1). The significant peaks as identified by ANOVA ( $p < 0.05$ ) is presented in Supplementary Table 1.2.

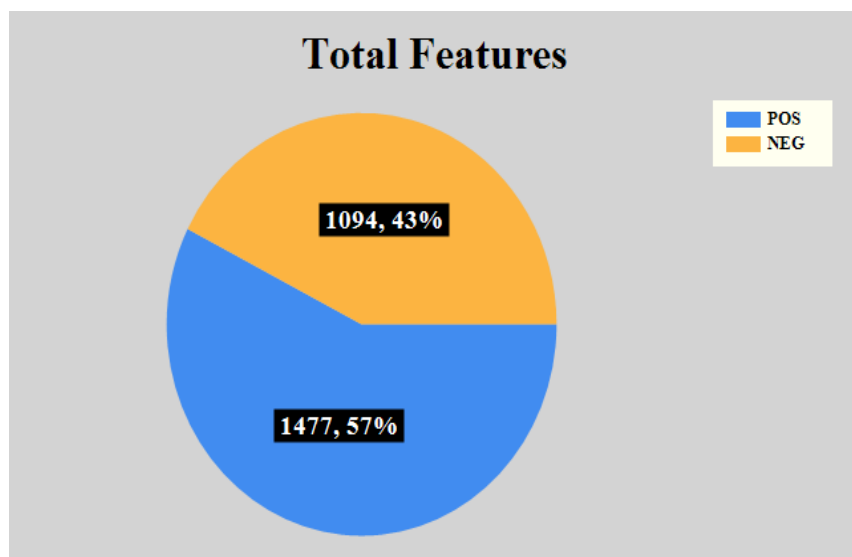

Supplementary Figure S1 Total number of metabolites in positive (POS) and negative (NEG) ion phases in the Xp91-118 carvacrol-treated study

**Supplementary Table S1.** Significant metabolites ( $P < 0.05$ ) annotated from untargeted metabolomics of carvacrol-treated *Xanthomonas perforans* reference strain 91-118 in the positive phase LC-MS. Unique metabolites identified for the first time in a microbial or xanthomonad system are in bold. Significant peaks were initially searched against SECIM database. The unidentified metabolites after SECIM search (unknown metabolites) were further searched against HMDB and METLIN databases. The annotation level is level 2 based on the chemical analysis working group of the Metabolomics Standards Initiative (MSI). For each metabolite, metabolite name is followed by an underscore followed by the molecular mass, a dash, and the retention time.

| Metabolite (Positive Mode)                                 | FDR        | <i>p</i> -value |
|------------------------------------------------------------|------------|-----------------|
| <b>SECIM Annotation</b>                                    |            |                 |
| Sn-glycerol 3-phosphate_173.0210-0.73                      | 2.7916E-27 | 3.1508E-30      |
| Alpha-aminoadipate/n-methyl-l-glutamate_162.0758-0.91      | 7.7314E-24 | 5.2357E-26      |
| Pyridoxal_168.0649-1.94                                    | 1.4782E-19 | 2.1689E-21      |
| Spermidine_146.1649-0.56                                   | 4.0805E-17 | 1.0593E-18      |
| Nepsilon, nepsilon, nepsilon-trimethyllysine_189.1594-0.71 | 4.9628E-17 | 1.3443E-18      |
| N-acetyl-hexosamine_244.0786-0.81                          | 9.0358E-17 | 2.6516E-18      |
| Hypoxanthine_137.0456-2.11                                 | 8.8689E-16 | 3.2032E-17      |
| Leu pro_229.1541-7.19                                      | 1.939E-15  | 7.8784E-17      |
| Anthranilate_120.0443-8.74                                 | 8.4898E-15 | 4.312E-16       |
| Glycyl-L-leucine_189.1230-6.75                             | 2.1202E-13 | 1.388E-14       |
| Cytidine_244.0922-1.66                                     | 5.945E-12  | 5.7034E-13      |
| Isocytosine_112.0504-1.65                                  | 1.008E-11  | 1.0011E-12      |
| Ethanolamine phosphate_142.0258-0.69                       | 1.0641E-11 | 1.0809E-12      |
| Nicotinamide_123.0551-1.70                                 | 1.8002E-11 | 1.9912E-12      |
| Guanosine 5'-monophosphate_364.0642-2.01                   | 1.9751E-11 | 2.2293E-12      |
| Uridine-5-monophosphate_325.0421-1.25                      | 3.2889E-11 | 3.7863E-12      |
| D-ribose_173.0420-0.78                                     | 6.8474E-11 | 8.1148E-12      |
| Creatine-D3_157.0774-0.91                                  | 1.1706E-10 | 1.4533E-11      |
| Glucosamine/mannosamine_180.0862-0.74                      | 1.3264E-08 | 2.1408E-09      |
| Putrescine_89.1073-0.60                                    | 2.387E-08  | 4.0142E-09      |
| Uracil_113.0344-1.44                                       | 2.6606E-08 | 4.5045E-09      |
| Carnosine_227.1132-0.71                                    | 4.7355E-08 | 8.5516E-09      |
| Cytosine_112.0504-0.86                                     | 1.92E-07   | 3.7707E-08      |
| Agmatine sulfate_131.1289-0.66                             | 2.6697E-07 | 5.3936E-08      |
| Glycerophosphocholine_258.1094-0.77                        | 4.4735E-07 | 9.2904E-08      |
| L-glutamine_147.0761-0.87                                  | 6.031E-07  | 1.2933E-07      |
| L-cystine_241.0307-0.69                                    | 1.128E-06  | 2.5082E-07      |
| L-proline_116.0705-0.86                                    | 2.206E-06  | 5.1042E-07      |
| Aldo/keto-hexose_203.0522-0.73                             | 1.2413E-05 | 3.1942E-06      |
| L-cysteine_122.0266-0.76                                   | 1.4654E-05 | 3.83E-06        |

|                                     |            |            |
|-------------------------------------|------------|------------|
| 6c-sugar alcohol_205.0678-0.72      | 2.1934E-05 | 5.8673E-06 |
| Uridine_267.0581-2.90               | 2.4197E-05 | 6.5272E-06 |
| 5-aminolevulinic acid_132.0653-0.74 | 5.0565E-05 | 1.4896E-05 |
| Urocanate_139.0500-2.02             | 9.5746E-05 | 2.907E-05  |

Supplementary Table S1 (Continued).

| <b>Metabolite (Positive Mode)</b>                     | <b>FDR</b> | <b>p-value</b> |
|-------------------------------------------------------|------------|----------------|
| <b>SECIM Annotation</b>                               |            |                |
| Adenosine 5'-monophosphate_348.0694-1.70              | 0.0001137  | 3.4905E-05     |
| L-serine_106.0498-0.70                                | 0.000121   | 3.7284E-05     |
| 4-aminobutanoate gaba_104.0705-0.79                   | 0.00020969 | 6.6979E-05     |
| Orthophosphate_98.9841-0.88                           | 0.00021828 | 7.0461E-05     |
| N-alpha-acetyl-l-lysine_189.1229-1.07                 | 0.00054279 | 0.00019053     |
| D--galactosamine_202.0682-0.67                        | 0.0021838  | 0.00088152     |
| Alpha-aminoadipate/n-methyl-l-glutamate_162.0758-1.05 | 0.0032597  | 0.0013833      |
| 5-aminolevulinic acid_132.0654-0.88                   | 0.0032626  | 0.0013883      |
| L-cysteine_122.0267-0.70                              | 0.0047266  | 0.0020912      |
| L-asparagine_133.0607-0.71                            | 0.005      | 0.0022404      |
| Ornithine_133.0969-0.63                               | 0.0051804  | 0.0023388      |
| DI-5-hydroxylysine_163.1074-0.63                      | 0.0085508  | 0.0041403      |
| Nicotinate_124.0392-1.42                              | 0.0085933  | 0.0041706      |
| L-lysine_147.1125-0.63                                | 0.01338    | 0.0069017      |
| Citrulline_176.1026-0.78                              | 0.01426    | 0.0074519      |
| N-acetyl-arginine_217.1291-1.66                       | 0.016184   | 0.0086397      |
| Pyridoxine_170.0804-2.93                              | 0.022344   | 0.012811       |
| Histamine_112.0867-0.62                               | 0.024173   | 0.014187       |
| Pipecolate/l-pipecolic acid_130.0861-1.25             | 0.024876   | 0.014656       |
| L-isoleucine_132.1017-2.22                            | 0.025579   | 0.015209       |
| Creatinine_114.0661-0.94                              | 0.025579   | 0.015215       |
| Glycine_76.0393-0.70                                  | 0.028101   | 0.016873       |
| Dopamine_154.0859-2.92                                | 0.030192   | 0.018503       |
| 5-oxo-l-proline_130.0497-1.86                         | 0.034851   | 0.021668       |
| L-cystathionine_223.0744-0.69                         | 0.034851   | 0.021674       |
| Creatine_132.0766-0.91                                | 0.039409   | 0.024998       |
| Taurine_126.0219-0.71                                 | 0.044435   | 0.028988       |
| 3-methyl-2-oxindole_148.0753-8.79                     | 0.049676   | 0.03308        |
| L-methionine_150.0581-1.43                            | 0.058479   | 0.039734       |
| Pyridoxine_192.0627-2.88                              | 0.058949   | 0.04012        |
| L-carnitine_162.1121-0.97                             | 0.059693   | 0.040694       |
| N-acetylputrescine_131.1176-1.13                      | 0.059786   | 0.040824       |

|                            |         |          |
|----------------------------|---------|----------|
| L-kynurenine_209.0915-6.43 | 0.06655 | 0.046022 |
|----------------------------|---------|----------|

Supplementary Table S1 (Continued).

| Metabolite (Positive Mode)              | FDR             | p-value         |
|-----------------------------------------|-----------------|-----------------|
| <b>HMDB/METLIN Annotation</b>           |                 |                 |
| <b>Sarmentosin_276.1071-6.30</b>        | <b>2.79E-27</b> | <b>3.15E-30</b> |
| N6,N6-dimethyladenosine_296.1344-7.38   | 7.66E-25        | 2.59E-27        |
| <b>Pyrocoll_187.0494-6.30</b>           | <b>7.73E-24</b> | <b>4.56E-26</b> |
| N2-acetyl-l-aminoadipate_204.0863-0.82  | 2.89E-22        | 2.61E-24        |
| Cytosine_204.0862-6.92                  | 1.11E-15        | 4.37E-17        |
| N-carbamoylputrescine_132.1130-1.47     | 5.84E-14        | 3.43E-15        |
| Valyvaline_217.1542-5.97                | 1.06E-12        | 8.41E-14        |
| <b>Harman_183.0915-8.80</b>             | <b>5.52E-12</b> | <b>5.21E-13</b> |
| <b>Piperidine_86.0964-1.07</b>          | <b>6.44E-10</b> | <b>8.73E-11</b> |
| <b>Norharman_157.1082-1.35</b>          | <b>9.18E-10</b> | <b>1.27E-10</b> |
| <b>Beta-carboline_169.0759-8.54</b>     | <b>1.78E-09</b> | <b>2.53E-10</b> |
| Oxoarginine_174.0872-0.97               | 9.08E-08        | 1.73E-08        |
| Hydroxypentobarbital_243.1334-8.19      | 2.03E-07        | 4.02E-08        |
| 5-nitro-ortho-anisidine_169.0602-1.70   | 3.89E-07        | 1.71E-06        |
| 8-hydroxylanylclavam_217.0814-1.48      | 5.43E-06        | 2.05E-05        |
| <b>Enterodiol sulfate_383.1149-0.73</b> | <b>3.11E-05</b> | <b>8.64E-06</b> |
| <b>(2s,4s)-monatin_293.1127-7.66</b>    | <b>3.33E-05</b> | <b>9.31E-06</b> |
| Prenyl-l-cysteine_190.0901-0.91         | 4.85E-05        | 1.41E-05        |
| Leu-gly-pro_286.1757-7.57               | 0.000216        | 6.93E-05        |
| 8-hydroxypurine_139.0612-2.11           | 0.000218        | 7.04E-05        |
| N-lactoyl-tryptophan_277.1177-8.65      | 0.000288        | 9.53E-05        |
| Ozagrel_229.0963-8.31                   | 0.000344        | 0.000117        |
| Ethirimol_210.1597-7.12                 | 0.001004        | 0.000376        |
| <b>Maculosin_261.1225-7.78</b>          | <b>0.001276</b> | <b>0.000485</b> |
| Ampicillin_350.1181-1.22                | 0.001706        | 0.000664        |
| 2-oxoarginine_174.0870-1.11             | 0.002284        | 0.000931        |
| Tulobuterol_228.1139-11.67              | 0.002858        | 0.001183        |
| Pyroglutamylglycine_187.0708-1.13       | 0.004322        | 0.001903        |
| Sulpho nonoate_142.9764-0.77            | 0.00916         | 0.004487        |
| Deoxycytidine_228.0973-1.51             | 0.010255        | 0.005104        |
| Pyroglutamylglycine_187.0709-1.59       | 0.010863        | 0.005493        |
| L-formylkynurenine_237.0863-3.95        | 0.011078        | 0.005614        |
| Isocarbamid_186.1232-0.91               | 0.011955        | 0.006086        |
| Zalcitabine_212.1025-3.70               | 0.012503        | 0.006392        |
| Metharbital_199.1072-5.85               | 0.016213        | 0.008674        |

|                            |          |          |
|----------------------------|----------|----------|
| Ectoine_143.0813-3.27      | 0.016308 | 0.008743 |
| Aprobarbital_211.1070-6.13 | 0.016656 | 0.008967 |
| Barbital_185.0915-2.57     | 0.020804 | 0.011599 |
| Etomidate_245.1275-8.70    | 0.020858 | 0.011677 |

Supplementary Table S1 (Continued).

| Metabolite (Positive Mode)            | FDR             | p-value        |
|---------------------------------------|-----------------|----------------|
| <b>HMDB/METLIN Annotation</b>         |                 |                |
| Homocitrulline_190.1181-0.82          | 0.020978        | 0.011767       |
| <b>Methoxybrassinin_267.0621-3.47</b> | <b>0.021912</b> | <b>0.01244</b> |
| Pyroglutmylglycine_187.0709-1.75      | 0.022412        | 0.012901       |
| Biotin_245.0949-6.24                  | 0.022911        | 0.01324        |
| 5-aminopentanamide_117.1021-0.81      | 0.023288        | 0.013536       |
| Lyxosylamine_150.0760-0.71            | 0.024173        | 0.014186       |
| Pirbuterol_241.1541-6.19              | 0.053326        | 0.036077       |
| Heptanoylcholine_216.1953-10.20       | 0.064041        | 0.043874       |
| Orotic acid_157.0241-1.22             | 0.066898        | 0.046436       |

**Supplementary Table S2.** Significant metabolites ( $P < 0.05$ ) annotated from untargeted metabolomics of *Xanthomonas perforans* reference strain 91-118 in the negative phase LC-MS. Unique metabolites identified for the first time in a microbial or xanthomonad system are in bold. Significant peaks were initially searched against SECIM database. The unidentified metabolites after SECIM search (unknown metabolites) were further searched against HMDB and METLIN databases. The annotation level is level 2 based on the chemical analysis working group of the Metabolomics Standards Initiative (MSI). For each metabolite, metabolite name is followed by an underscore followed by the molecular mass, a dash, and the retention time.

| Metabolite (negative mode)                                                          | FDR        | p-value    |
|-------------------------------------------------------------------------------------|------------|------------|
| <b>SECIM Annotation</b>                                                             |            |            |
| N-methyl-l-glutamate_160.0624-0.91                                                  | 2.9343E-24 | 8.9462E-27 |
| Glycerol 2-phosphate/sn-glycerol 3-phosphate_171.0064-0.71                          | 7.8672E-24 | 3.8632E-26 |
| Pantetheine_277.1228-8.01                                                           | 9.2761E-21 | 7.0702E-23 |
| Malate_133.0149-1.13                                                                | 1.1837E-15 | 2.7065E-17 |
| 2-aminoethyl dihydrogen phosphate_140.0121-0.70                                     | 1.4002E-15 | 3.6287E-17 |
| N-acetyl-hexosamine_220.0831-0.82                                                   | 4.0311E-15 | 1.3519E-16 |
| Uridine-5-monophosphate_323.0292-1.26                                               | 4.0268E-14 | 1.6574E-15 |
| N-acetyl-d-mannosamine_256.0600-0.81                                                | 7.2005E-14 | 3.0734E-15 |
| Xanthine_151.0264-2.59                                                              | 8.4553E-14 | 3.895E-15  |
| Uracil_111.0202-1.42                                                                | 8.4553E-14 | 3.9957E-15 |
| Aldopentose_149.0470-0.79                                                           | 1.371E-13  | 6.8966E-15 |
| Hypoxanthine_135.0315-2.13                                                          | 8.3636E-13 | 4.9723E-14 |
| L-cysteine-s-sulfate_199.9696-0.75                                                  | 5.2772E-12 | 4.344E-13  |
| Cmp_322.0451-1.07                                                                   | 1.1542E-11 | 1.0557E-12 |
| D-glucuronic acid/d-glucuronolactone/d--galacturonic acid_193.0359-0.78             | 2.1825E-11 | 2.2291E-12 |
| Cytidine_242.0787-1.65                                                              | 2.6934E-10 | 3.2436E-11 |
| L-glutamine_145.0622-0.73                                                           | 3.612E-10  | 4.4049E-11 |
| Guanosine 5'-monophosphate_362.0515-2.02                                            | 6.606E-10  | 8.9625E-11 |
| L-histidine_154.0626-0.69                                                           | 1.0128E-09 | 1.4821E-10 |
| 5-aminolevulinic acid_130.0513-0.74                                                 | 1.4427E-09 | 2.1772E-10 |
| Uridine_243.0627-2.91                                                               | 1.7721E-09 | 2.8095E-10 |
| L-serine_104.0354-0.69                                                              | 2.3794E-09 | 3.8811E-10 |
| 1,2-Benzisothiazolin-3-one_150.0022-10.07                                           | 5.2743E-09 | 9.4874E-10 |
| D-ribose 5-phosphate/ribulose 5-phosphate_229.0124-0.73                             | 8.0711E-09 | 1.4887E-09 |
| C <sub>6</sub> H <sub>12</sub> O <sub>6</sub> -hexose/ketose/inositol_179.0566-0.75 | 9.0725E-09 | 1.7426E-09 |
| N-acetyl-l-aspartic acid_174.0416-1.71                                              | 5.3133E-08 | 1.1582E-08 |
| 3-2-hydroxyphenylpropanoate_165.0560-8.64                                           | 8.0539E-08 | 1.8048E-08 |

|                                           |            |            |
|-------------------------------------------|------------|------------|
| Urocanate_137.0359-2.03                   | 2.2001E-07 | 5.2654E-08 |
| Ll-2,6-diaminoheptanedioate_189.0898-0.85 | 2.7276E-07 | 6.6527E-08 |
| Alpha-aminoadipate_160.0619-1.06          | 3.3311E-06 | 9.3435E-07 |
| Citrulline_174.0864-0.78                  | 3.5314E-05 | 1.1305E-05 |
| Asparagine_131.0466-0.71                  | 5.2996E-05 | 1.7207E-05 |
| Adenosine 5'-monophosphate_346.0564-1.72  | 6.9942E-05 | 2.3349E-05 |

Supplementary Table S2 (Continued).

| Metabolite (negative mode)               | FDR             | p-value         |
|------------------------------------------|-----------------|-----------------|
| <b>SECIM Annotation</b>                  |                 |                 |
| L-kynurenine_207.0779-6.43               | 0.00020696      | 7.3508E-05      |
| Carnosine_225.0999-0.71                  | 0.00031548      | 0.00011542      |
| Pyridoxine_168.0669-2.93                 | 0.00049281      | 0.00018781      |
| 2,3-dihydroxyisovalerate_133.0514-1.43   | 0.0011866       | 0.00048477      |
| 4-oxoproline_128.0356-1.86               | 0.0015953       | 0.00067606      |
| Glucose/fructose_217.0307-0.72           | 0.0022663       | 0.00098712      |
| DL-5-hydroxylysine_161.0936-0.63         | 0.0023271       | 0.0010359       |
| Proline_114.0562-0.85                    | 0.0034356       | 0.0016235       |
| Pantothenic acid_218.1037-6.59           | 0.0036309       | 0.0017269       |
| Succinate_117.0195-2.31                  | 0.0038121       | 0.0018189       |
| 3-sulfinol-alanine_152.0027-0.77         | 0.0062424       | 0.0031593       |
| Glucose/fructose_215.0333-0.73           | 0.0064674       | 0.0033027       |
| L-methionine_148.0428-1.43               | 0.011411        | 0.0062272       |
| Citramalate_147.0308-2.27                | 0.0182          | 0.010431        |
| Taurine_124.0075-0.69                    | 0.018616        | 0.010699        |
| N-acetyl-L-alanine_130.0513-2.29         | 0.018833        | 0.010854        |
| C12H22O11-disaccharide-6C_341.1095-0.89  | 0.018833        | 0.010881        |
| Indole-3-acetate_174.0583-9.27           | 0.018945        | 0.011003        |
| L-cystathionine_221.0606-0.85            | 0.022196        | 0.013162        |
| Xylenesulfonate_185.0281-8.21            | 0.027803        | 0.016741        |
| Glutarate_131.0353-4.77                  | 0.038273        | 0.023581        |
| L-cysteic acid_167.9975-0.72             | 0.052222        | 0.033116        |
| <b>HMDB/METLIN Annotation</b>            |                 |                 |
| <b>Sarmentosin_274.0923-6.30</b>         | <b>3.56E-25</b> | <b>5.42E-28</b> |
| Sulfate_96.9600-0.91                     | 1.54E-13        | 7.99E-15        |
| Sulfonic acid_334.0762-0.84              | 9.47E-13        | 5.77E-14        |
| Uridine_243.0626-1.52                    | 5.21E-10        | 6.59E-11        |
| 8-Hydroxypurine_137.0472-2.13            | 1.52E-09        | 2.32E-10        |
| Desacetylcefotaxime_412.0401-1.06        | 8.89E-09        | 1.69E-09        |
| Glycylprolylhydroxyproline_284.1258-3.09 | 9.64E-09        | 1.88E-09        |

|                                      |                 |                 |
|--------------------------------------|-----------------|-----------------|
| Carboxylic acid_265.0195-2.57        | 1.69E-08        | 3.34E-09        |
| L-Ornithine_302.1365-7.13            | 7.29E-07        | 1.88E-07        |
| N-histidine_316.1156-1.61            | 8.90E-07        | 2.31E-07        |
| Glycerol_245.0435-0.75               | 1.19E-06        | 3.17E-07        |
| Glycerophosphoinositol_333.0584-2.92 | 6.28E-06        | 1.81E-06        |
| Hydroxyaminaline_126.0199-1.09       | 1.03E-05        | 3.03E-06        |
| 2-Oxoarginine_172.0727-1.12          | 9.05E-05        | 3.08E-05        |
| Penmacric acid_201.0526-0.79         | 9.57E-05        | 3.27E-05        |
| Propanoic acid_275.1043-8.64         | 0.00028         | 0.000101        |
| <b>Saccharopine_275.1260-0.76</b>    | <b>0.000283</b> | <b>0.000103</b> |

Supplementary Table S2 (Continued).

| Metabolite (negative mode)                             | FDR             | p-value         |
|--------------------------------------------------------|-----------------|-----------------|
| <b>HMDB/METLIN Annotation</b>                          |                 |                 |
| p-Toluenesulfonic acid_171.0126-7.17                   | 0.000408        | 0.000154        |
| Pyroglutamylglycine_185.0577-1.64                      | 0.000753        | 0.000295        |
| N-Nonanoylglycine_214.1453-9.28                        | 0.00093         | 0.000368        |
| Phenylalanyl_261.0885-8.00                             | 0.001006        | 0.000405        |
| Dimethoxyquinazoline_219.0880-7.30                     | 0.001873        | 0.000802        |
| <b>Cyclobrassinone_231.0245-0.76</b>                   | <b>0.002399</b> | <b>0.001071</b> |
| Trihydroxyoxane-2-carboxylic acid_305.0636-1.49        | 0.002433        | 0.001098        |
| 7-oxabicyclo[4.1.0]hept-3-ene-2,5-dione_123.0089-1.19  | 0.004355        | 0.002105        |
| Purine_119.0363-1.26                                   | 0.004829        | 0.002363        |
| <b>beta-carboline-3-carboxylic acid_215.0830-8.22</b>  | <b>0.008274</b> | <b>0.004351</b> |
| R-138727(Prasugrel)_348.1060-1.16                      | 0.015033        | 0.008359        |
| Potassium 2-(1'-ethoxy) ethoxypropanoate_199.0375-0.84 | 0.027385        | 0.016406        |
| Uridine 2',3'-cyclic phosphate_305.0191-2.31           | 0.031861        | 0.01933         |
| Propanoic acid_275.1036-8.03                           | 0.057912        | 0.037342        |
